# Supplementary material for: Potential clinopyroxene and orthopyroxene reference materials for SIMS water content analysis
Source: Royal Society of Chemistry journal article supplement (doi:10.1039/d3ja00007a), 2023-01-01
Supplement: d3ja00007a1.xlsx [file d3ja00007a1.xlsx]

## Sheet: Table S1-SIMS-cpx
	Primary Current	16O/Coeffa	1sde	18O/Coeff	1sd	18O/16O	1sd	16O1H/16O	1sd
	nA	L1b	%	H1c	%	H1/L1	%	EMd/L1	%
Bou Ibalghatene-cpx
Fragment1@01	2.27726	942493000	0.0165764	1903003	0.0226791	0.00201944	0.0113226	0.000125478	0.038406
Fragment1@02	2.20825	943114800	0.0177928	1904385	0.0144153	0.00201962	0.012583	0.000128138	0.03409
Fragment1@03	2.23798	952508400	0.00528353	1921802	0.0153535	0.00201717	0.0148436	0.000130382	0.0359637
Fragment1@04	2.26411	932138800	0.0107238	1882787	0.0162761	0.0020201	0.00972369	0.000122564	0.0423962
Fragment1@05	2.17829	931784100	0.0138436	1880866	0.017688	0.00201856	0.00903813	0.000128771	0.0311343
Fragment1@06	2.14684	934788700	0.00660573	1886459	0.0112902	0.00201813	0.0109062	0.000130376	0.030917
Fragment1@07	2.1675	954439300	0.00753534	1923960	0.0170075	0.00201593	0.0125029	0.000128681	0.0307693
Fragment1@08	2.12971	937161900	0.00664002	1893287	0.0125544	0.00202018	0.013521	0.000123924	0.0386454
Fragment1@09	2.18588	947671300	0.0786897	1913729	0.0720549	0.0020192	0.0151363	0.000130662	0.053408
Fragment1@10	2.15944	934257200	0.019185	1886866	0.0206259	0.00201946	0.00830859	0.000126735	0.0313022
Fragment1@11	2.12861	897684800	0.00587004	1813946	0.0165142	0.00202076	0.0148198	0.000125388	0.0320844
Fragment1@12	2.15607	893583600	0.0166362	1805678	0.0220472	0.00202092	0.00951594	0.000125444	0.0321461
Fragment1@13	2.06736	913135800	0.0284937	1843401	0.0319151	0.00201883	0.0112703	0.000132091	0.0311872
Fragment1@14	2.08199	872555700	0.0153002	1764417	0.0217549	0.00202231	0.0131273	0.000125342	0.0325431
Fragment1@15	2.04898	900836300	0.00659119	1818186	0.0125611	0.00201832	0.0127266	0.000133657	0.0322445
Fragment1@16	2.09169	892671700	0.00970863	1801023	0.017416	0.00201754	0.0122878	0.000125251	0.0321812
Fragment1@17	2.08332	906092400	0.00792218	1828573	0.0111143	0.00201809	0.00922449	0.000129209	0.0315187
Fragment1@18	2.07667	906842400	0.00647104	1829359	0.0109203	0.00201749	0.00969521	0.000131985	0.0312207
Fragment1@19	2.08136	910818100	0.0129594	1837576	0.0125923	0.00201707	0.00837856	0.000135162	0.0346287
Fragment1@20	2.02527	895314000	0.00805794	1806056	0.0121053	0.0020175	0.0108469	0.000134079	0.0451219
Fragment1@21	2.03466	919519200	0.00626839	1855664	0.0134219	0.00201808	0.0114258	0.000130303	0.0311742
Fragment1@22	2.02801	901819400	0.0109467	1818965	0.0123934	0.002017	0.00885034	0.000128288	0.0316906
Fragment1@23	2.09631	915259800	0.00467512	1845760	0.0152419	0.00201657	0.0128847	0.000135012	0.0308121
Fragment1@24	2.00775	893589900	0.00641302	1803114	0.0117083	0.00201796	0.0116871	0.00012936	0.0405266
Fragment1@25	2.03137	898909200	0.00532279	1813019	0.0123509	0.00201697	0.0112267	0.000131091	0.0370434
Fragment1@26	1.9842	891714400	0.0102531	1799685	0.0151777	0.00201826	0.0139025	0.000131793	0.0314981
Fragment1@27	2.01628	893583500	0.00931969	1802503	0.0169939	0.00201707	0.0135082	0.000134021	0.0312438
Fragment1@28	1.91989	921217700	0.0186037	1857660	0.0243133	0.00201657	0.0117156	0.000128101	0.0547651
Fragment1@29	1.96808	899815800	0.0202381	1814514	0.0241997	0.00201671	0.0157395	0.000132642	0.0312712
Fragment2@01	1.96816	888832700	0.00588936	1794164	0.0128958	0.0020187	0.0112478	0.000128635	0.0318855
Fragment2@02	1.9425	877740300	0.00445237	1771205	0.00891829	0.00201788	0.00853493	0.000129731	0.0757261
Fragment2@03	1.93194	873393200	0.0128617	1763920	0.0145842	0.00201988	0.00855207	0.00012771	0.0322676
Fragment2@04	1.92357	898619100	0.0113613	1812552	0.0191757	0.00201678	0.0120988	0.000131292	0.0314294
Fragment2@05	1.9497	904721000	0.00895507	1823485	0.0140276	0.0020156	0.0125689	0.000129578	0.0318918
Fragment2@06	1.94211	914858100	0.0164805	1844369	0.0198505	0.00201588	0.0115819	0.00012968	0.0443763
Fragment2@07	1.92287	916781400	0.010155	1848537	0.0144894	0.0020165	0.0100526	0.000128586	0.0314017
Fragment2@08	1.91129	912533800	0.00855541	1842069	0.00914016	0.00201839	0.0118081	0.000124624	0.0383141
Fragment3@01	1.93632	865235900	0.0305658	1745289	0.0280215	0.00201708	0.0108231	0.000113726	0.0399704
Fragment3@02	1.908	878082000	0.036606	1772048	0.0166754	0.00201748	0.0132157	0.000133442	0.0778125
Fragment3@03	1.94274	899864000	0.00989707	1813826	0.0131191	0.00201552	0.00899401	0.000118745	0.0365869
Fragment3@04	1.91457	894294000	0.0105556	1802683	0.0119576	0.00201591	0.00949567	0.000124853	0.0322056
Fragment3@05	1.91395	901144800	0.00856522	1816019	0.018936	0.00201545	0.0182276	0.000126349	0.0319171
Fragment3@06	1.86826	910609100	0.00990823	1835669	0.0149351	0.00201569	0.00838431	0.000124549	0.0319469
Fragment3@07	1.88461	878922800	0.00805328	1773316	0.00911408	0.00201768	0.0114306	0.000117585	0.0333276
Fragment3@08	1.86529	902344600	0.00473903	1819893	0.0185447	0.00201685	0.0178065	0.000119275	0.0366933
Fragment3@09	1.87561	906816600	0.00714018	1828478	0.00839124	0.00201643	0.00839885	0.000121368	0.0545939
Fragment3@10	1.84683	920016600	0.00892896	1853922	0.0140167	0.0020151	0.011533	0.000125223	0.0317114
Fragment4@01	1.8516	917012400	0.0193062	1847281	0.0248025	0.00201434	0.00938313	0.000122948	0.0372449
Fragment4@02	1.84557	910048300	0.00596384	1833981	0.0148602	0.00201512	0.0125917	0.000118328	0.032661
Fragment4@03	1.84393	922483800	0.0185887	1858471	0.0181631	0.00201398	0.0108262	0.00012217	0.0329513
Fragment4@04	1.8322	883802000	0.00686167	1779030	0.0131658	0.00201314	0.00895284	0.000121322	0.0355883
Fragment4@05	1.80176	891114000	0.012848	1794842	0.0224065	0.00201438	0.0140645	0.000121769	0.0486459
Fragment4@06	1.80529	907556200	0.0120999	1827677	0.0151976	0.00201392	0.00840055	0.000122014	0.0322859
Fragment4@07	1.81287	889235500	0.00919279	1790617	0.0137313	0.00201366	0.0120134	0.000122293	0.0343067
Fragment4@08	1.78135	1022986000	0.015737	2071917	0.0186733	0.0020257	0.013656	0.000123205	0.0400137
Fragment5@01	1.72424	837995900	0.013771	1689382	0.0212512	0.00201598	0.0151916	0.000126388	0.0330877
Fragment5@02	1.73026	854756400	0.0133146	1722311	0.0132289	0.00201493	0.0126482	0.00012984	0.0323804
Fragment5@03	1.69193	883840900	0.00536044	1780667	0.0122012	0.00201467	0.0109266	0.000129667	0.031866
Fragment5@04	1.68778	901452000	0.00980262	1814586	0.0111764	0.00201308	0.0117645	0.000132696	0.0312341
Fragment5@05	1.72017	900592400	0.00645977	1813554	0.0147298	0.00201385	0.0138521	0.000132358	0.0359501
Fragment5@06	1.68778	865988300	0.0180511	1744643	0.0266832	0.00201463	0.0162858	0.000127852	0.0323891
Fragment5@07	1.67691	862006900	0.00707841	1738499	0.0155434	0.00201637	0.0140832	0.000127532	0.0324916
Fragment6@01	1.72259	832931300	0.00562168	1678506	0.0132488	0.00201539	0.0132724	0.000108085	0.0356929
Fragment6@02	1.69858	847263300	0.00848573	1706633	0.0207149	0.00201423	0.0153257	0.000116335	0.0340967
Fragment6@03	1.69881	861180500	0.0152026	1734257	0.0213376	0.00201394	0.0146168	0.000121224	0.0332282
Fragment6@04	1.6967	865391500	0.00837946	1741809	0.0166848	0.00201256	0.0114265	0.000123092	0.0329286
Fragment6@05	1.6744	880291500	0.00807182	1772115	0.0173977	0.00201291	0.00964437	0.000123073	0.032656
Fragment6@06	1.66024	866213900	0.0175183	1744180	0.0190754	0.00201404	0.0087684	0.000115818	0.0371586
Fragment6@07	1.64546	883415500	0.0099735	1778317	0.0199329	0.00201311	0.0129811	0.000123912	0.0325031
Fragment6@08	1.67745	882562700	0.0151355	1776430	0.0221174	0.00201281	0.0133539	0.000127244	0.0321455
Fragment6@09	1.64288	861489400	0.0253945	1733986	0.028524	0.00201277	0.0110744	0.000121873	0.0331422
Fragment6@10	1.67174	858903100	0.01326	1728241	0.0234375	0.0020121	0.0122808	0.000119105	0.0335254
Fragment6@11	1.64248	874158400	0.00865449	1759267	0.0194641	0.00201253	0.0156036	0.000124515	0.0326041
Fragment6@12	1.62833	881122900	0.0123881	1774374	0.0186169	0.00201319	0.0123494	0.000122794	0.0326695
Fragment6@13	1.5932	853058300	0.0176283	1719551	0.0238227	0.00201575	0.0131831	0.000119169	0.0344732
Fragment6@14	1.57325	858054600	0.0125197	1728250	0.017098	0.00201429	0.0123093	0.000116807	0.0357078
Fragment6@15	1.62027	860127700	0.00810852	1731368	0.0146596	0.00201263	0.0125962	0.000118762	0.0365027
Fragment6@16	1.63568	811819400	0.0149947	1635834	0.0246271	0.00201471	0.0144938	0.000115928	0.0392952
Fragment6@17	1.58389	810950600	0.00933796	1634757	0.00973153	0.00201561	0.0110626	0.000115279	0.0366921
KLB-1-cpx
Fragment1@01	3.11613	1209693000	0.011412	2446223	0.0146552	0.0020223	0.00848992	7.76396e-05	0.0337411
Fragment1@02	3.42663	1334303000	0.627463	2685242	0.691478	0.00201232	0.0655111	7.23483e-05	0.0514795
Fragment1@03	3.01552	1200065000	0.0191077	2421593	0.0203403	0.002018	0.00942796	7.56573e-05	0.0422174
Fragment1@04	3.81521	1388853000	0.0150145	2803394	0.0179768	0.00201837	0.0082456	6.81412e-05	0.0367998
Fragment1@05	3.51151	1271304000	0.00699261	2563464	0.01238	0.00201659	0.0114874	7.50408e-05	0.0333692
Fragment1@06	3.05957	1312997000	0.021029	2650457	0.0212238	0.00201832	0.00787157	7.36999e-05	0.0350929
Fragment1@07	3.12505	1303150000	0.0065487	2630320	0.00924593	0.00201843	0.00933424	7.28406e-05	0.0333551
Fragment1@08	3.75653	1376107000	0.0128004	2776585	0.0147175	0.00201779	0.00711065	6.91819e-05	0.0331201
Fragment1@09	3.00136	1227236000	0.391035	2478475	0.392813	0.00201979	0.0125157	7.56966e-05	0.0791379
Fragment1@10	3.1317	1273200000	0.0167781	2573260	0.0173325	0.0020211	0.00975807	6.98548e-05	0.0352179
Fragment1@11	3.15744	1220249000	0.00954337	2463645	0.0126032	0.00201893	0.0100128	7.43788e-05	0.0451763
Fragment1@12	3.14797	1218540000	0.0204436	2461818	0.0180555	0.0020203	0.0134437	7.64419e-05	0.0338333
Fragment1@13	3.7635	1384208000	0.00904657	2794165	0.00978703	0.00201851	0.00859474	7.0458e-05	0.0338151
Fragment1@14	3.08922	1207154000	0.0131985	2440051	0.0146421	0.00202114	0.00924184	7.74984e-05	0.0338039
Fragment1@15	3.07349	1211469000	0.0119939	2447889	0.0138554	0.00202067	0.00763331	7.68071e-05	0.0345669
Fragment1@16	3.05777	1214243000	0.00477053	2453669	0.00841605	0.0020207	0.0072447	7.41377e-05	0.0393902
Fragment1@17	3.00191	1217938000	0.0211553	2458665	0.0166537	0.00201903	0.0136917	7.71802e-05	0.0337121
Fragment1@18	2.97993	1188672000	0.00367911	2400953	0.00961772	0.00201998	0.00996139	7.43402e-05	0.0406031
Fragment1@19	3.1626	1219722000	0.0322362	2461577	0.0331489	0.00201823	0.00723323	7.78461e-05	0.0335733
Fragment2@01	2.99378	1101484000	0.016562	2226555	0.0190689	0.00202141	0.00760724	6.67688e-05	0.0403278
Fragment2@02	2.92008	1149266000	0.00802081	2322548	0.0149513	0.00202101	0.0102393	7.17057e-05	0.0476865
Fragment2@03	2.88965	1159399000	0.0173728	2343038	0.0183999	0.00202088	0.00886328	7.1097e-05	0.0454757
Fragment2@04	2.84334	1144135000	0.00932067	2312099	0.0144739	0.00202109	0.00987097	6.86568e-05	0.0364987
Fragment2@05	2.81995	1152929000	0.00594739	2326368	0.00796176	0.00201779	0.00983437	7.36063e-05	0.0353073
Fragment2@06	2.86986	1139084000	0.00887824	2300867	0.0104601	0.00201991	0.00748301	6.81632e-05	0.0365967
Fragment2@07	2.83489	1151366000	0.00465337	2323323	0.0101609	0.00201795	0.0094937	7.06579e-05	0.0358959
Fragment2@08	2.81369	1158694000	0.00749407	2338599	0.0146758	0.00201827	0.0116753	7.22141e-05	0.0354751
Fragment2@09	2.84576	1164086000	0.00967131	2349505	0.0134205	0.00201818	0.0113882	7.24178e-05	0.0353607
Fragment2@10	2.96937	1113104000	0.00839637	2247907	0.0112903	0.00201957	0.0104349	6.82892e-05	0.048981
Fragment2@11	2.80978	1151027000	0.0105389	2325226	0.0142148	0.00202029	0.0089375	7.25635e-05	0.0355285
Fragment2@12	2.8611	1154705000	0.00706635	2330904	0.0134068	0.00201862	0.00770617	7.37432e-05	0.0352494
Fragment2@13	2.84999	1151928000	0.00951356	2324828	0.011163	0.00201821	0.00923185	7.61324e-05	0.0563515
Fragment2@14	2.8377	1152812000	0.00487337	2325991	0.0106735	0.00201767	0.00955729	7.40224e-05	0.0390402
Fragment2@15	2.91148	1147114000	0.00731816	2317952	0.00922726	0.0020206	0.00745527	7.06775e-05	0.0359558
Fragment2@16	2.81189	1138649000	0.00476527	2299175	0.011019	0.00201903	0.0117768	7.3624e-05	0.0453002
Fragment2@17	2.83888	1113448000	0.011407	2246715	0.0115105	0.00201803	0.00997191	7.21399e-05	0.0395855
Fragment2@18	2.91077	1124125000	0.00698568	2272842	0.0130392	0.00202181	0.010053	6.83809e-05	0.036787
Fragment2@19	2.76972	1107336000	0.00992523	2235320	0.0139409	0.00201865	0.00759222	7.27252e-05	0.0374914
Fragment3@01	2.77457	1137729000	0.00764685	2297157	0.0112976	0.00201924	0.0110111	6.55338e-05	0.0371735
Fragment3@02	2.77504	1167133000	0.0234881	2355385	0.0202483	0.00201816	0.011439	7.65273e-05	0.0741559
Fragment3@03	2.73475	1151052000	0.00831445	2324237	0.0139054	0.00201903	0.00879871	7.2394e-05	0.0553405
Fragment3@04	2.73389	1145007000	0.010069	2312101	0.0118161	0.00201926	0.00858708	6.92428e-05	0.0363354
Fragment3@05	2.70589	1143839000	0.00666658	2307223	0.0116672	0.00201696	0.00818106	7.38249e-05	0.0443572
Fragment3@06	2.66387	1131478000	0.00377441	2284174	0.0149956	0.0020186	0.0111971	7.04218e-05	0.0362522
Fragment3@07	2.71856	1148863000	0.00464848	2319319	0.0167091	0.00201893	0.0126399	7.21464e-05	0.0381311
Fragment3@08	2.64134	1154272000	0.0182905	2329035	0.0183529	0.00201756	0.00775103	6.65975e-05	0.0366868
Fragment4@01	2.6875	1109877000	0.0187035	2240258	0.0237729	0.00201826	0.0094327	7.01777e-05	0.0395346
Fragment4@02	2.5779	1134298000	0.00595192	2290125	0.0106633	0.00201891	0.00920832	6.85069e-05	0.046243
Fragment4@03	2.5355	1135559000	0.00388805	2291163	0.00859368	0.0020177	0.00801099	6.87356e-05	0.0379632
Fragment4@04	2.58932	1140332000	0.0180765	2301283	0.0181372	0.00201809	0.00807265	6.93269e-05	0.0363362
Fragment4@05	2.56256	1141938000	0.0173801	2301134	0.0237852	0.00201511	0.0133433	7.27358e-05	0.0356362
Fragment4@06	2.53057	1120840000	0.00702855	2261795	0.0103197	0.00201803	0.00775046	7.10338e-05	0.0363042
Fragment4@07	2.51093	1119938000	0.0146333	2258416	0.025129	0.00201641	0.0138495	7.09983e-05	0.0463579
Fragment4@08	2.5387	1107766000	0.00722695	2233781	0.0114503	0.00201662	0.0105563	7.02449e-05	0.0412532
Fragment4@09	2.53331	1104705000	0.0109885	2227776	0.0131578	0.00201671	0.00781213	6.92303e-05	0.0369349
Fragment4@10	2.52924	1106585000	0.0329467	2232110	0.0345765	0.00201728	0.0075977	7.37217e-05	0.0360033
Fragment4@11	2.52173	1102666000	0.0102355	2225398	0.0148719	0.00201838	0.0135629	7.30848e-05	0.0361937
Fragment4@12	2.49755	1094919000	0.0116749	2208743	0.0151028	0.00201745	0.0108414	6.98878e-05	0.0416603
Fragment4@13	2.46665	1098377000	0.0197233	2214731	0.021026	0.00201648	0.0076276	7.13751e-05	0.0400008
Fragment4@14	2.50851	1099483000	0.285864	2216920	0.284986	0.00201619	0.0120065	7.68441e-05	0.0592662
Fragment4@15	2.49059	1057229000	0.0116655	2134312	0.0179504	0.00201878	0.0105471	6.61857e-05	0.0493854
Fragment5@01	2.49357	1098284000	0.0227443	2214817	0.0228686	0.00201681	0.0107864	7.24456e-05	0.036392
Fragment5@02	2.48778	1108106000	0.0212252	2232640	0.0247692	0.00201483	0.00966572	7.63593e-05	0.0354854
Fragment5@03	2.45891	1108457000	0.0133729	2235641	0.0137637	0.00201687	0.0116778	7.49259e-05	0.0362972
Fragment5@04	2.49826	1120621000	0.0262941	2259012	0.0295823	0.00201586	0.01264	7.71755e-05	0.0570179
Fragment5@05	2.43708	1115908000	0.00748917	2249800	0.0185194	0.0020162	0.0146998	7.63134e-05	0.0385251
Fragment5@06	2.49505	1108177000	0.0204975	2232334	0.0232513	0.0020145	0.0128966	7.72169e-05	0.0432801
Fragment5@07	2.46845	1104461000	0.00664679	2225511	0.00949352	0.00201526	0.00845148	7.33126e-05	0.0554367
Fragment5@08	2.46423	1072323000	0.00877696	2162533	0.0131705	0.00201682	0.00853515	6.93075e-05	0.0374673
Fragment5@09	2.49396	1089335000	0.0125814	2194575	0.0176859	0.00201455	0.0135916	7.45142e-05	0.03948
Fragment5@10	2.45312	1080588000	0.02362	2178765	0.0240251	0.00201628	0.00937025	7.5557e-05	0.0360829
Fragment5@11	2.43395	1105187000	0.0122443	2229904	0.0151797	0.00201795	0.00843635	7.66159e-05	0.0354878
Fragment5@12	2.48308	1099645000	0.00999283	2215679	0.0144471	0.00201481	0.00762596	7.74923e-05	0.0416213
Fragment5@13	2.45844	1117768000	0.0379903	2253294	0.0358578	0.002016	0.00832012	7.47652e-05	0.050747
Fragment5@14	2.45578	1121215000	0.0170847	2259739	0.0210081	0.00201544	0.0117026	7.46502e-05	0.0464319
Fragment5@15	2.47338	1125905000	0.0200704	2269165	0.0224535	0.00201506	0.010403	7.71571e-05	0.0466414
Fragment5@16	2.47385	1118269000	0.0217762	2252285	0.0241275	0.00201406	0.0119979	7.49375e-05	0.129677
Fragment5@17	2.45265	1122108000	0.010139	2263100	0.0143147	0.00201671	0.0108265	7.25632e-05	0.0359766
Fragment5@18	2.47369	1122267000	0.0255911	2262027	0.0249276	0.00201549	0.00899183	7.59814e-05	0.0353252
Fragment5@19	2.48074	1091288000	0.0314549	2202327	0.0431118	0.00201765	0.0122496	7.1681e-05	0.0366528
06JY31-cpx
Fragment1@01	3.10612	1226374000	0.019178	2474142	0.0220281	0.00201745	0.0113523	4.457e-05	0.0450336
Fragment1@02	3.12959	1213425000	0.0192864	2447639	0.0185782	0.0020171	0.0081266	4.37711e-05	0.05204
Fragment1@03	3.06974	1198164000	0.0180197	2418857	0.0197122	0.00201906	0.0140013	4.17569e-05	0.0697488
Fragment1@04	3.0645	1165164000	0.0156253	2349938	0.0224355	0.00201693	0.0118091	4.18809e-05	0.0483001
Fragment1@05	3.06317	1169890000	0.0227364	2358648	0.0246905	0.00201613	0.0104097	4.28611e-05	0.0510365
Fragment2@01	3.07295	1215446000	0.0352182	2450662	0.0321329	0.00201627	0.00919377	4.27369e-05	0.0422974
Fragment2@02	3.01443	1221974000	0.0216851	2461891	0.0235108	0.00201484	0.00776586	4.3698e-05	0.0422372
Fragment2@03	3.08366	1202186000	0.0215846	2423688	0.0268824	0.00201573	0.00969904	4.23356e-05	0.0644807
Fragment2@04	3.02718	1163935000	0.0267074	2347081	0.0270445	0.00201673	0.0104932	4.47838e-05	0.105734
Fragment2@05	3.07788	1176975000	0.036063	2375982	0.0369654	0.00201874	0.00831814	4.46122e-05	0.0466832
Fragment2@06	3.0548	1165421000	0.0159392	2347613	0.0181073	0.00201434	0.00740717	4.25078e-05	0.0498704
Fragment2@07	3.0634	1210496000	0.016478	2436920	0.0273213	0.00201359	0.00739608	4.47428e-05	0.0508086
Fragment2@08	3.00293	1210968000	0.0286039	2441381	0.0251193	0.00201634	0.0103956	4.39711e-05	0.0438728
Fragment3@01	3.03055	1204510000	0.013659	2426014	0.0163626	0.00201422	0.00728628	4.34442e-05	0.0437086
Fragment3@02	2.94293	1216161000	0.0255984	2452762	0.0283961	0.0020167	0.00803332	4.23872e-05	0.0605519
Fragment3@03	3.00176	1229957000	0.0256072	2478340	0.0248256	0.00201533	0.00731057	4.34848e-05	0.0558536
Fragment3@04	2.98337	1180675000	0.017548	2377983	0.0274126	0.00201376	0.0123967	4.40115e-05	0.0579113
Fragment3@05	2.94926	1164011000	0.0653389	2348758	0.0849446	0.00201781	0.0208096	4.2915e-05	0.0453656
Fragment4@01	2.94934	1204390000	0.0426496	2428045	0.0457514	0.002016	0.0106099	4.36649e-05	0.0493666
Fragment4@04	3.03657	1288386000	0.0303396	2593363	0.0350949	0.00201293	0.00836052	4.52125e-05	0.0510222
Fragment4@02	2.97711	1203696000	0.0192113	2425179	0.0195753	0.00201466	0.00965451	4.38931e-05	0.041925
Fragment4@05	3.04838	1262750000	0.0548858	2542906	0.0549037	0.00201378	0.00792148	4.58497e-05	0.134203
Fragment4@06	3.01889	1258161000	0.0297492	2535948	0.028724	0.0020156	0.00881124	4.42522e-05	0.0473929
Fragment4@03	2.97218	1215090000	0.0161211	2450407	0.0228669	0.00201651	0.00901162	4.43238e-05	0.0622387
Fragment4@07	2.99276	1274948000	0.0411978	2565035	0.0373643	0.00201228	0.00708447	4.4326e-05	0.156603
Fragment5@01	2.98447	1231570000	0.0150217	2482462	0.0191385	0.00201583	0.00720223	4.20681e-05	0.146649
Fragment5@02	2.9085	1211148000	0.057477	2438923	0.0535206	0.00201269	0.0112382	4.15327e-05	0.0424939
Fragment5@03	2.8643	1224315000	0.0195961	2463122	0.0246504	0.00201201	0.00954624	4.20504e-05	0.0476968
Fragment5@04	2.86219	1234398000	0.012372	2486156	0.0133094	0.00201414	0.0108252	4.24716e-05	0.0417213
Fragment5@05	2.80704	1193455000	0.0452042	2403542	0.0550223	0.00201379	0.0124818	4.23222e-05	0.0423984
Fragment5@06	2.80461	1204895000	0.00996886	2424429	0.0138496	0.00201203	0.0114823	4.25438e-05	0.042109
Fragment5@07	2.80156	1204654000	0.00572248	2423599	0.011445	0.00201169	0.0090104	4.27434e-05	0.0548637
Fragment6@01	2.736	1208149000	0.0284307	2432032	0.0314776	0.00201302	0.011087	4.47465e-05	0.0480227
Fragment6@02	2.70917	1191924000	0.0191816	2399262	0.0212463	0.00201284	0.0116438	4.30329e-05	0.0420462
Fragment6@03	2.75728	1185536000	0.0288613	2385721	0.0312191	0.00201226	0.00930204	4.38354e-05	0.0514639
Fragment6@04	2.74359	1231849000	0.0407954	2478229	0.0468364	0.00201179	0.0105023	4.57154e-05	0.0449864
Fragment7@01	2.70135	1196265000	0.0179213	2410739	0.0178613	0.00201522	0.00741319	4.37747e-05	0.0420169
Fragment7@02	2.73655	1202028000	0.0298662	2419146	0.0321143	0.00201238	0.00959609	4.48125e-05	0.1688
Fragment7@03	2.69509	1185734000	0.0160004	2387527	0.0195181	0.00201346	0.00789394	4.33239e-05	0.0509165
Fragment7@04	2.74054	1174859000	0.0346117	2364902	0.0386828	0.00201279	0.0103814	4.32498e-05	0.0425762
Fragment7@05	2.72396	1198823000	0.019368	2412912	0.020161	0.00201229	0.00839458	4.55221e-05	0.0463524
Fragment7@06	2.73428	1198687000	0.0151534	2411677	0.0217704	0.00201208	0.00838818	4.55933e-05	0.0413855
Fragment7@07	2.70541	1206251000	0.0192642	2426433	0.0194788	0.00201135	0.00963944	4.58428e-05	0.0411813
Diopside-cpx
Fragment1@01	3.25421	1278982000	0.021046	2591111	0.021839	0.00202592	0.008731	6.2e-06	1.31e-08
Fragment1@02	3.22847	1269579000	0.026668	2571671	0.031966	0.00202561	0.007487	7e-06	1.3e-08
Fragment1@03	3.21932	1214194000	0.028329	2457975	0.029295	0.00202437	0.007298	5.49e-06	0.081658
Fragment1@04	3.21392	1270616000	0.009246	2574842	0.013928	0.00202645	0.008271	7e-06	1.38e-08
Fragment1@05	3.21102	1226635000	0.021828	2487084	0.02026	0.00202757	0.010919	6.4e-06	1.07e-08
Fragment1@06	3.19021	1219251000	0.025693	2469008	0.026786	0.00202502	0.007222	6.63e-06	0.081654
Fragment1@07	3.18873	1294656000	0.041243	2624141	0.040506	0.0020269	0.008079	7.3e-06	1.4e-08
Fragment1@08	3.18607	1255803000	0.017613	2544650	0.021603	0.00202631	0.008554	6.4e-06	1.49e-08
Fragment1@09	3.15759	1232682000	0.010321	2496469	0.012946	0.00202523	0.007182	6.42984e-06	0.0443048
Fragment1@10	3.14828	1257585000	0.04798	2549162	0.049268	0.00202703	0.011065	7.6e-06	1.47e-08
Fragment1@11	3.14116	1208407000	0.019292	2447355	0.024349	0.00202527	0.008751	6.32e-06	0.083859
Fragment1@12	3.13772	1236722000	0.019317	2504740	0.021022	0.00202531	0.010523	5.94e-06	0.083911
Fragment1@13	3.11879	1207131000	0.019023	2445903	0.016923	0.00202621	0.007737	7.06881e-06	0.105772
Fragment1@14	3.10604	1214936000	0.012739	2461868	0.014559	0.00202634	0.009533	6.34291e-06	0.105323
Fragment1@15	3.06098	1215015000	0.022788	2460227	0.027472	0.00202485	0.013878	7.5e-06	1.22e-08
Fragment1@16	3.03101	1151126000	0.03558	2330865	0.036559	0.00202486	0.007434	5.94006e-06	0.100244
Fragment1@17	2.93369	1178538000	0.036517	2385775	0.039412	0.00202435	0.007347	6.38e-06	0.103307
Fragment1@18	2.93057	1170494000	0.00806	2370237	0.0121	0.00202499	0.008176	6.64e-06	0.085366
Fragment1@19	2.89857	1175437000	0.015708	2381952	0.01906	0.00202644	0.008636	6.18e-06	0.179043
Fragment1@20	2.88879	1209372000	0.048733	2449497	0.042902	0.00202543	0.007925	6.12e-06	0.152061
Fragment1@21	2.88691	1162368000	0.013229	2354004	0.017653	0.00202518	0.01304	6.67e-06	0.130939
Fragment1@22	2.79702	1133582000	0.019928	2295349	0.021069	0.00202486	0.008099	5.53e-06	0.083671
Fragment1@23	2.75767	1135951000	0.020148	2299825	0.02159	0.00202458	0.009107	6.34e-06	0.135858
Fragment1@24	2.71324	1162724000	0.03693	2355390	0.03802	0.00202575	0.008572	6.29e-06	0.143583
Fragment1@25	2.7112	1150599000	0.018882	2329589	0.022308	0.00202467	0.008662	6.53e-06	0.148964
Fragment1@26	2.6983	1115255000	0.026777	2257206	0.02898	0.00202394	0.01024	7.24e-06	0.178906
Fragment1@27	2.69368	1111249000	0.009692	2249991	0.011914	0.00202474	0.009049	5.67e-06	0.085159
Fragment1@28	2.67819	1043532000	0.032742	2113409	0.036261	0.00202525	0.011232	5.95e-06	0.094853
Fragment2@01	3.25421	1278982000	0.021046	2591111	0.021839	0.00202592	0.008731	1.04e-05	0.11866
Fragment2@02	3.24052	1230314000	0.014069	2491537	0.015103	0.00202512	0.010335	1.49e-05	0.126048
Fragment2@03	3.21392	1270616000	0.009246	2574842	0.013928	0.00202645	0.008271	1.12e-05	0.101178
Fragment2@04	3.19021	1219251000	0.025693	2469008	0.026786	0.00202502	0.007222	1.64e-05	0.139624
Fragment2@05	3.18873	1294656000	0.041243	2624141	0.040506	0.0020269	0.008079	1.15e-05	0.116395
Fragment2@06	3.18607	1255803000	0.017613	2544650	0.021603	0.00202631	0.008554	1.06e-05	0.122626
Fragment2@07	3.18466	1218001000	0.049281	2467548	0.050575	0.0020259	0.007224	1.4e-05	0.121719
Fragment2@08	3.18466	1218001000	0.049281	2467548	0.050575	0.0020259	0.007224	1.4e-05	0.104017
Fragment2@09	3.16346	1213859000	0.043987	2459193	0.048971	0.00202593	0.009941	1.24e-05	0.12521
Fragment2@10	3.16346	1213859000	0.043987	2459193	0.048971	0.00202593	0.009941	1.24e-05	0.0973084
Fragment2@11	3.14828	1257585000	0.04798	2549162	0.049268	0.00202703	0.011065	1.18e-05	0.175639
Fragment2@12	3.14116	1208407000	0.019292	2447355	0.024349	0.00202527	0.008751	1.57e-05	0.0879302
Fragment2@13	3.13866	1208840000	0.036502	2447801	0.038455	0.00202492	0.007252	1.52e-05	0.0884544
Fragment2@14	3.13866	1208840000	0.036502	2447801	0.038455	0.00202492	0.007252	1.52e-05	0.0867016
Fragment2@15	3.13592	1237043000	0.027711	2503880	0.028257	0.00202408	0.007172	1.39e-05	0.0868989
Fragment2@16	3.13592	1237043000	0.027711	2503880	0.028257	0.00202408	0.007172	1.39e-05	0.105897
Fragment2@17	3.1281	1208913000	0.01474	2448421	0.017858	0.00202531	0.00931	1.46e-05	0.0927268
Fragment2@18	3.12763	1223050000	0.01553	2475874	0.02156	0.00202434	0.010389	1.44e-05	0.0881074
Fragment2@19	3.1263	1236708000	0.042844	2502807	0.045959	0.00202377	0.009193	1.43e-05	0.0915247
Fragment2@20	3.1263	1236708000	0.042844	2502807	0.045959	0.00202377	0.009193	1.43e-05	0.0850041
Fragment2@21	2.86853	1142139000	0.018858	2312443	0.021329	0.00202466	0.008865	1.5e-05	0.0951679
Fragment2@22	2.83708	1134192000	0.01192	2296926	0.016266	0.00202517	0.009078	1.5e-05	0.0834953
Fragment2@23	2.6868	1044971000	0.013008	2116148	0.014621	0.00202508	0.007804	1.52e-05	0.0842002
Fragment2@24	2.68664	1117423000	0.019785	2262925	0.022835	0.00202513	0.016134	1.27e-05	0.0777178
Fragment2@25	2.67952	1096535000	0.015339	2219564	0.021868	0.00202416	0.01107	1.46e-05	0.087777
118318 (SC-J1)
Point@01	4.01712	1118072000	0.0577381	2271409	0.0600439	0.00203154	0.0149023	1.2355e-05	0.100946
Point@02	4.00382	1114182000	0.0854588	2260014	0.0867213	0.00202841	0.0144841	1.22506e-05	0.108713
Point@03	3.99623	1064356000	0.105132	2160522	0.107288	0.00202989	0.012376	1.22009e-05	0.103871
Point@04	3.99162	1108601000	0.0920993	2251018	0.0954747	0.0020305	0.0219334	1.22653e-05	0.117871
Point@05	3.98333	1104568000	0.0964921	2243626	0.0888743	0.00203123	0.0159036	1.23239e-05	0.112454
Point@06	3.98223	1077099000	0.0663275	2186422	0.0645326	0.00202992	0.0131714	1.22508e-05	0.118213
Point@07	3.95845	1106091000	0.0594779	2247882	0.0647766	0.00203227	0.0139746	1.34479e-05	0.108279
Point@08	3.97018	1132566000	0.0711876	2301955	0.074042	0.00203251	0.0168166	1.27347e-05	0.0993398
Point@09	3.95939	1096765000	0.101206	2228071	0.103271	0.00203149	0.0196187	1.25411e-05	0.10144
Point@10	3.94898	1117793000	0.108836	2270219	0.107328	0.00203098	0.00983783	1.26994e-05	0.104705
Point@11	3.93451	1078805000	0.0542137	2191238	0.0565316	0.00203117	0.0100329	1.20297e-05	0.103631
Point@12	3.9435	1080031000	0.293393	2193130	0.288309	0.00203062	0.0157552	1.24533e-05	0.130057
Point@13	3.92715	1068454000	0.0720425	2169382	0.0780321	0.00203039	0.0225811	1.23793e-05	0.103198
Point@14	3.88812	1077259000	0.0923837	2187966	0.0942825	0.00203105	0.019526	1.2256e-05	0.127245
Point@15	3.8828	1076689000	0.0564177	2186858	0.0608925	0.0020311	0.0199459	1.23708e-05	0.102826
Point@16	3.86981	1084455000	0.0937859	2203630	0.0943935	0.00203202	0.0101963	1.32657e-05	0.131018
Point@17	3.87169	1042155000	0.030265	2115027	0.0322496	0.00202947	0.0125353	1.14969e-05	0.107833
Point@18	3.8853	1039225000	0.0659516	2109031	0.0689394	0.00202943	0.0101314	1.18789e-05	0.106001
117213-5 (SLP-108)
Point@01	3.86434	1091298000	0.0810063	2216903	0.0836543	0.00203144	0.0117526	5.10969e-05	0.15963
Point@02	3.86449	1099057000	0.0854249	2233196	0.0902713	0.00203192	0.0151559	4.39672e-05	0.0572814
Point@03	3.88108	1093453000	0.102134	2221243	0.104551	0.0020314	0.0184253	4.37206e-05	0.0575703
Point@04	3.85104	1098635000	0.0980285	2231057	0.098403	0.00203075	0.0111042	4.31648e-05	0.0577592
Point@05	3.84094	1081283000	0.0960021	2195754	0.0969035	0.00203069	0.0221311	4.42081e-05	0.0641834
Point@06	3.8321	1076040000	0.0943281	2184320	0.0936301	0.00202996	0.0124809	4.87211e-05	0.0553128
Point@07	3.83085	1078504000	0.112843	2185438	0.112502	0.00202636	0.0125562	4.24614e-05	0.150755
Point@08	3.79494	1054647000	0.102952	2141091	0.102899	0.00203015	0.00942557	4.9382e-05	0.055535
Point@09	3.78861	1063162000	0.338217	2158568	0.337018	0.00203033	0.017262	5.33724e-05	0.0543599
Point@10	3.77883	1043118000	0.0949437	2116425	0.090926	0.00202894	0.0147781	5.1778e-05	0.0546958
Point@11	3.80206	1033235000	0.0900433	2097528	0.0908828	0.00203006	0.017673	5.25718e-05	0.0545548
Point@12	3.79588	1028230000	0.0856788	2086893	0.0872136	0.0020296	0.0154351	4.97806e-05	0.0816343
Point@13	3.78071	1024661000	0.0386599	2079462	0.0386757	0.00202942	0.0144186	4.97147e-05	0.0686588
Point@14	3.7976	1020197000	0.0779855	2070005	0.0802491	0.00202902	0.0155618	4.97313e-05	0.0642741
Point@15	3.76271	1046506000	0.0442466	2123552	0.0476183	0.00202918	0.0172415	4.38642e-05	0.0587603
Point@16	3.76021	1029968000	0.058102	2089717	0.0573331	0.00202892	0.00997717	4.43263e-05	0.0589561
Point@17	3.75387	1053567000	0.0852842	2139049	0.0856532	0.00203029	0.0138717	4.50654e-05	0.0668621
Point@18	3.74589	1031085000	0.0717064	2093039	0.0713147	0.00202994	0.00916666	4.63059e-05	0.057796
Point@19	3.72172	991945800	0.0917487	2012818	0.0892784	0.00202916	0.0163511	6.02847e-05	0.0523331
Point@20	3.73478	1019743000	0.0477936	2069838	0.0480963	0.00202976	0.0110564	5.20532e-05	0.0551589
Point@21	3.72454	1004386000	0.359523	2038841	0.352379	0.00202995	0.022455	5.17254e-05	0.0557359
Point@22	3.69794	988667100	0.0474494	2005603	0.0454422	0.00202859	0.0146534	5.29042e-05	0.0620988
Point@23	3.68722	926496600	0.0471741	1879010	0.0484629	0.00202808	0.0137906	5.35498e-05	0.05713
Point@24	3.69755	982139800	0.0541175	1991441	0.0537899	0.00202766	0.0169645	6.53039e-05	0.396575
Point@25	3.47193	920703100	0.0346839	1868058	0.0417544	0.00202895	0.0125295	5.09606e-05	0.0585994
Point@26	3.4526	904932600	0.308597	1836646	0.310464	0.00202959	0.0170014	5.48287e-05	0.0803882
Point@27	3.45198	946814000	0.0676039	1921189	0.0695226	0.00202911	0.0137391	5.51345e-05	0.06302
Point@28	3.44861	921312100	0.0181666	1870355	0.0280347	0.0020301	0.015775	5.59266e-05	0.0561784
Point@29	3.46121	962951100	0.0683351	1953128	0.0748335	0.00202827	0.0195617	4.38431e-05	0.0728104
Point@30	3.44822	962419100	0.0191091	1952759	0.017141	0.00202901	0.0112649	4.43675e-05	0.0609616
Point@31	3.47138	922860600	0.0515236	1872926	0.0484787	0.00202948	0.0121466	4.76399e-05	0.0766002
Point@32	3.4059	961938100	0.0528013	1950911	0.0595687	0.0020281	0.0160158	4.31037e-05	0.0772062
116610-18 (DGO-160)
Point@01	3.68026	1076909000	0.0636996	2188165	0.0723904	0.00203189	0.024656	2.93321e-05	0.0746863
Point@02	3.66696	1048338000	0.0737392	2129857	0.075117	0.00203165	0.011141	2.87727e-05	0.0762841
Point@03	3.65585	1058714000	0.0910341	2151354	0.0906929	0.00203205	0.00993904	2.94151e-05	0.0752389
Point@04	3.64951	1052483000	0.0690833	2137737	0.074381	0.00203114	0.0306761	2.9324e-05	0.0883645
Point@05	3.63277	1039002000	0.107504	2110162	0.108158	0.00203095	0.0138739	2.9244e-05	0.0761271
Point@06	3.64889	1023021000	0.0665724	2078242	0.0673754	0.00203148	0.0191149	2.94227e-05	0.093963
Point@07	3.64615	1046579000	0.0727365	2125600	0.0752498	0.002031	0.014329	2.90759e-05	0.0974663
Point@08	3.61955	1032640000	0.0710127	2098024	0.0733302	0.00203171	0.0102446	2.92544e-05	0.0767525
Point@09	3.61681	1035738000	0.0752477	2104295	0.0780469	0.00203169	0.0159531	2.88504e-05	0.0793443
Point@10	3.62401	1027182000	0.0528154	2086801	0.0552668	0.00203158	0.0142678	3.43969e-05	0.616414
Point@11	3.59757	1041627000	0.0873436	2115178	0.0850434	0.00203065	0.00981386	2.88952e-05	0.0763987
Point@12	3.62549	1011246000	0.0740842	2054126	0.071889	0.00203128	0.0120011	2.91968e-05	0.077214
Point@13	3.60836	1052556000	0.0673109	2136588	0.0711306	0.0020299	0.00916298	2.91576e-05	0.0757259
Point@14	3.61102	1020467000	0.0925504	2073066	0.0905986	0.00203149	0.0108574	2.93684e-05	0.0766835
Point@15	3.58372	1039123000	0.0746376	2109272	0.0777832	0.00202986	0.00900401	2.93431e-05	0.0760191
Point@16	3.57026	1014336000	0.0758988	2058914	0.0748669	0.00202981	0.0169039	2.89846e-05	0.0773226
Point@17	3.58129	1011365000	0.100482	2053159	0.0951998	0.00203009	0.0132137	2.9052e-05	0.0829406
Point@18	3.57402	973854600	0.114486	1976428	0.117923	0.00202949	0.0125142	2.87721e-05	0.0880364
Point@19	3.55399	985178900	0.0744515	1998871	0.0730694	0.00202894	0.0110196	2.90955e-05	0.0783372
Point@20	3.53224	976413200	0.0744174	1982000	0.0748869	0.00202988	0.00986244	2.86295e-05	0.0791992
Point@21	3.55219	1007656000	0.207469	2045963	0.210606	0.00203042	0.0101646	2.9135e-05	0.0826683
Point@22	3.55767	1000964000	0.171343	2032277	0.172662	0.00203032	0.0126707	2.8843e-05	0.07799
116610-21 (DGO-166)
Point@01	3.50197	941531200	0.318623	1912160	0.326915	0.0020309	0.0189235	6.13886e-05	0.053688
Point@02	3.51973	985606200	0.0483522	2002495	0.048134	0.00203174	0.00792931	5.92823e-05	0.0506275
Point@03	3.49837	1005848000	0.0808199	2042474	0.0814606	0.0020306	0.00961431	5.79877e-05	0.0506256
Point@04	3.73205	969294500	0.115438	1967009	0.11853	0.00202932	0.0124668	5.72682e-05	0.0618812
Point@05	3.50854	953767000	0.142882	1936188	0.14614	0.00203004	0.0157584	5.75944e-05	0.0595011
Point@06	3.4925	890465200	0.0802825	1805866	0.0807579	0.002028	0.019296	5.65117e-05	0.0551338
Point@07	3.49735	909477100	0.108733	1845137	0.10959	0.00202879	0.0155608	5.91243e-05	0.0567319
Point@08	3.47412	924003000	0.101325	1875685	0.103064	0.00202995	0.0111986	5.94789e-05	0.0572004
Point@09	3.46207	940766200	0.0394733	1909246	0.0420592	0.00202946	0.0135301	5.99469e-05	0.0515531
Point@10	3.48225	932534500	0.0908852	1893786	0.0929347	0.0020308	0.0162585	6.16887e-05	0.0511032
Point@11	3.481	923044400	0.133357	1873073	0.138044	0.00202923	0.0142888	6.12187e-05	0.0649187
Point@12	3.46426	887637300	0.324946	1801245	0.331525	0.00202925	0.0179147	6.09152e-05	0.0526813
Point@13	3.43829	877906900	0.068239	1780508	0.0705572	0.00202813	0.0143945	6.08989e-05	0.0536725
Point@14	3.44548	911908100	0.0896874	1851028	0.0886741	0.00202984	0.0147532	6.2323e-05	0.0514341
Point@15	3.45151	915830200	0.133892	1859202	0.133635	0.00203007	0.0103148	6.24894e-05	0.0583991
118316-1 (KH03-4)
Point@01	3.43148	948747800	0.0856233	1926390	0.0856181	0.00203046	0.00854713	8.05978e-05	0.0493267
Point@02	3.47153	931032100	0.116582	1889851	0.116336	0.00202985	0.0142201	7.75458e-05	0.0453862
Point@03	3.45785	914939500	0.0849132	1856168	0.0890806	0.00202873	0.0193215	7.66709e-05	0.046026
Point@04	3.43852	929478800	0.10749	1884546	0.106344	0.00202753	0.014915	7.43526e-05	0.0464426
Point@05	3.43304	910342100	0.0874913	1845993	0.0858725	0.0020278	0.0142812	7.42817e-05	0.050513
Point@06	3.42194	925641300	0.0544568	1878407	0.0577033	0.0020293	0.0213928	7.13344e-05	0.0486114
Point@07	3.42733	915383600	0.144948	1856846	0.146701	0.00202849	0.0155558	7.00748e-05	0.0479853
Point@08	3.41842	896286400	0.0940408	1816789	0.100028	0.00202702	0.0221549	7.1106e-05	0.0481642
Point@09	3.42866	840294900	0.0769486	1703744	0.0753415	0.00202756	0.0168908	7.3572e-05	0.0489555
Point@10	3.40214	907242800	0.0790528	1839979	0.0767431	0.0020281	0.0147354	6.79047e-05	0.0489088
Point@11	3.38204	831851300	0.280138	1687068	0.28799	0.00202808	0.0278066	6.97199e-05	0.0648017
Point@12	3.37617	887215500	0.073755	1798750	0.0714304	0.00202741	0.0165543	7.26782e-05	0.0479188
Point@13	3.37578	874268800	0.059662	1773481	0.0665898	0.00202853	0.0176539	8.29504e-05	0.0591791
Point@14	3.35176	887529900	0.15361	1801674	0.147309	0.00202999	0.0177353	7.84708e-05	0.0462249
Point@15	3.33416	885427100	0.0516619	1797594	0.0558348	0.0020302	0.0189745	7.88638e-05	0.0534223
Point@16	3.35873	886394800	0.360659	1799116	0.359168	0.0020297	0.0221524	7.88318e-05	0.0548754
Point@17	3.35904	855278600	0.136405	1735058	0.139065	0.00202864	0.0197762	7.80836e-05	0.0471952
Point@18	3.32837	844761200	0.105879	1712525	0.106347	0.00202723	0.0220678	7.71689e-05	0.0477498
Point@19	3.30999	830007000	0.0718795	1683130	0.0797233	0.00202785	0.0132868	7.36676e-05	0.0673245
Point@20	3.32321	850391900	0.281987	1725284	0.276972	0.00202882	0.0207163	7.77335e-05	0.0474301
Note: a The Faraday cup gain calibration was performed during machine tuning and the coeffition for specific Faraday cup was obtained and then applied to the singal collected. b 16O is detected using the 1010 Ohm Faraday cup, located in the L1 position. c 18O is detected using the 1011 Ohm Faraday cup, located in the H1 position. d 16O1H is detected using the electron multiplier of monocollector.…

## Sheet: Table S2-SIMS-opx
	Primary Current	16O/Coeffa	1sde	18O/Coeff	1sd	18O/16O	1sd	16O1H/16O	1sd
	nA	L1b	%	H1c	%	H1/L1	%	EM/L1d	%
ICH-30-opx
Fragment1@01	3.36232	1354936000	0.0449763	2724064	0.0478785	0.00201047	0.00968277	0.000123094	0.0379528
Fragment1@02	3.27924	1385152000	0.23293	2786250	0.23587	0.00201142	0.00845629	0.000122625	0.030739
Fragment1@03	3.3358	1421983000	0.0229862	2858757	0.0232048	0.0020104	0.00676493	0.000131416	0.0297222
Fragment1@04	3.2589	1466368000	0.0556253	2947655	0.0602274	0.00201017	0.0109351	0.000123326	0.0313034
Fragment1@05	3.30357	1342338000	0.00852575	2699910	0.0137058	0.00201129	0.00868709	0.000126119	0.0312841
Fragment1@06	3.26993	1378741000	0.0142685	2771558	0.0163711	0.00201005	0.00914462	0.000123399	0.0365736
Fragment1@07	3.26008	1406832000	0.0195961	2826739	0.0217776	0.00200963	0.00773964	0.000122141	0.0341107
Fragment1@08	3.22651	1422167000	0.0186597	2859275	0.0189909	0.00201059	0.0078751	0.000123817	0.0657489
Fragment1@09	3.23739	1454716000	0.0203945	2923652	0.0231675	0.00200978	0.00839767	0.000127109	0.0289228
Fragment1@10	3.22996	1349571000	0.0137691	2711433	0.0121407	0.00200923	0.00757202	0.000106455	0.0378769
Fragment1@11	3.20219	1386852000	0.0083814	2784794	0.0125179	0.0020081	0.00699319	0.000104225	0.0498561
Fragment1@12	3.19233	1412467000	0.00727562	2838836	0.0115957	0.00200992	0.00983359	0.000119503	0.0299027
Fragment1@13	3.18357	1408604000	0.0120687	2832562	0.0173879	0.00201089	0.00867309	0.000111283	0.0410488
Fragment1@14	3.15087	1439497000	0.0181881	2893109	0.0199858	0.0020097	0.00792047	0.000113822	0.032653
Fragment1@15	3.15767	1458010000	0.0201479	2929562	0.0218162	0.00200929	0.00802436	0.000116666	0.0352548
Fragment1@16	3.22221	1336666000	0.0239465	2687202	0.0273842	0.00201048	0.00867749	0.000101138	0.0439216
Fragment1@17	3.22159	1394310000	0.0052527	2800913	0.0107495	0.00200878	0.0118365	9.90017e-05	0.0483637
Fragment1@18	3.17739	1403238000	0.00784761	2818793	0.0141742	0.00200869	0.0079781	9.93146e-05	0.0521065
Fragment1@19	3.15298	1430257000	0.0189928	2872125	0.0229043	0.00200802	0.00669916	0.000110429	0.054864
Fragment1@20	3.12966	1428045000	0.0131143	2865975	0.0147469	0.0020071	0.010933	0.000116302	0.0405643
Fragment1@21	3.11887	1303730000	0.029547	2619325	0.0267791	0.0020091	0.00967371	0.000101255	0.0464536
Fragment1@22	3.12857	1375925000	0.0159838	2763918	0.0211862	0.00200866	0.00869769	9.52278e-05	0.0334684
Fragment1@23	3.07146	1371339000	0.00859659	2755195	0.0135464	0.00200926	0.00990161	9.7521e-05	0.0654017
Fragment1@24	3.0422	1379914000	0.0139559	2772981	0.0213425	0.00200969	0.0107469	8.87044e-05	0.061629
Fragment2@01	3.06129	1274804000	0.0168317	2563600	0.0195734	0.00201098	0.00901094	0.000101394	0.037935
Fragment2@02	3.07905	1331074000	0.0229955	2677995	0.0294276	0.00201191	0.0106371	0.000108292	0.0311288
Fragment2@03	3.1385	1372470000	0.0147823	2758702	0.0208477	0.0020097	0.00844776	0.000119978	0.040069
Fragment2@04	3.0857	1268966000	0.0111005	2551621	0.0145484	0.00201091	0.00710387	0.000100914	0.0331629
Fragment2@05	3.07443	1350109000	0.0683317	2709922	0.0674345	0.00200752	0.010902	0.000111368	0.046727
Fragment2@06	3.08601	1333239000	0.0267211	2677765	0.0300616	0.00200847	0.0101581	0.000102366	0.0370287
Fragment2@07	3.03336	1360418000	0.0063314	2735655	0.0130159	0.00201082	0.00987641	0.000129137	0.0277219
Fragment2@08	3.02843	1355220000	0.0091245	2725738	0.0145731	0.00201125	0.00958068	0.000122004	0.0367313
Fragment2@09	2.97727	1307139000	0.0253399	2629200	0.0283396	0.00201102	0.00974809	0.000121299	0.0369659
Fragment2@10	2.99229	1363950000	0.0169196	2739587	0.0193429	0.00200858	0.0068548	0.000124909	0.0321829
Fragment2@11	3.01646	1343880000	0.0217176	2699662	0.026721	0.00200877	0.00717705	0.000117415	0.0352467
Fragment2@12	2.9793	1376573000	0.0265529	2767677	0.0296152	0.00201047	0.00706167	0.000118983	0.0323657
Fragment2@13	3.03876	1361908000	0.0100816	2734455	0.0133568	0.00200774	0.0094706	0.000125767	0.0357799
Fragment2@14	2.96796	1358122000	0.0257225	2726349	0.0261229	0.00200717	0.0116801	0.00010351	0.0320918
Fragment2@15	2.99252	1295651000	0.0126021	2604189	0.0146346	0.00201002	0.00874676	9.49626e-05	0.0398959
Fragment2@16	2.96718	1332764000	0.0396847	2677096	0.0456126	0.00200825	0.0110701	9.8109e-05	0.0425111
Fragment2@17	2.96358	1356619000	0.0191431	2724312	0.0229695	0.00200808	0.00791508	9.9794e-05	0.0409752
Fragment2@18	2.95372	1348474000	0.0157444	2708301	0.0214693	0.00200857	0.0110348	0.00011247	0.0439168
Fragment2@19	2.94371	1341571000	0.0174774	2692665	0.0184542	0.00200722	0.00691417	8.42837e-05	0.0332021
Fragment2@20	2.91664	1351900000	0.0265116	2715391	0.0332162	0.00200855	0.0130735	0.000110635	0.0377089
Fragment2@21	2.90185	1346185000	0.0528912	2704145	0.0550494	0.00200878	0.00893604	0.000118037	0.0354145
Fragment2@22	2.91257	1353052000	0.0664053	2716910	0.0695276	0.00200799	0.00948208	0.000115552	0.0489396
Fragment2@23	2.91101	1371144000	0.00970546	2753783	0.0132899	0.00200823	0.00724191	0.000109523	0.0360862
Fragment2@24	2.91202	1371856000	0.0159048	2756205	0.0204	0.00200919	0.00731864	0.000112514	0.0401299
Fragment2@25	2.87267	1310600000	0.00902108	2634905	0.0122597	0.00201038	0.00829	0.0001108	0.0346993
Fragment3@01	2.90537	1222915000	0.138132	2458242	0.123518	0.00201016	0.0240986	0.000126104	0.0351262
Fragment3@02	2.86211	1288810000	0.0141324	2589998	0.0172741	0.0020096	0.00826459	0.000100525	0.0303098
Fragment3@03	2.89567	1274099000	0.0134934	2559731	0.0152204	0.0020092	0.00796984	0.000119793	0.0329176
Fragment3@04	2.86555	1265967000	0.0182821	2542968	0.0222172	0.00200884	0.0130537	0.000119802	0.0283168
Fragment3@05	2.89638	1284840000	0.0373097	2582325	0.0331771	0.0020099	0.012662	0.000113598	0.0290434
Fragment3@06	2.88355	1251209000	0.0444902	2514484	0.043847	0.00200975	0.0079227	0.000123177	0.054359
Fragment3@07	2.86774	1298480000	0.0286066	2608397	0.0325778	0.00200889	0.00976618	0.000120876	0.0328271
Fragment3@08	2.85945	1307115000	0.0143821	2627213	0.0255603	0.00200973	0.00958546	0.000116251	0.0367127
Fragment3@09	2.85468	1296654000	0.0202659	2604989	0.0256453	0.00200898	0.00927134	0.000126434	0.0453011
Fragment3@10	2.86407	1298653000	0.0286469	2607972	0.0317349	0.0020082	0.007027	0.000121325	0.0370207
Fragment3@11	2.86	1283831000	0.0100402	2578072	0.0145907	0.00200796	0.0112758	0.00012677	0.0454924
Fragment3@12	2.87713	1326073000	0.00656618	2664641	0.0135336	0.00200945	0.00857934	0.000109539	0.0364875
Fragment3@13	2.83731	1236587000	0.0115457	2483864	0.0132073	0.00200854	0.00867519	0.00012546	0.0328075
Fragment3@14	2.8492	1308857000	0.0473397	2628448	0.0494703	0.00200806	0.0092866	0.000115701	0.030152
Fragment3@15	2.84694	1260185000	0.0319856	2529745	0.0302371	0.00200735	0.0087253	0.000125277	0.0338097
Fragment3@16	2.86274	1281013000	0.0082648	2572394	0.0178463	0.00200811	0.00978572	0.000128308	0.0360775
Fragment3@17	2.85875	1285745000	0.00856613	2584158	0.011601	0.0020099	0.00802486	0.000125093	0.0393401
Fragment3@18	2.86563	1324211000	0.0210105	2658025	0.0208613	0.00200753	0.00815031	0.000106574	0.0347274
Fragment3@19	2.8334	1367042000	0.00796007	2745332	0.0127639	0.00200829	0.00737373	9.9907e-05	0.0380625
Fragment3@20	2.81408	1347455000	0.0129027	2703549	0.0159585	0.00200625	0.00690133	9.9483e-05	0.0371913
Fragment3@21	2.79687	1317756000	0.0164493	2646886	0.0198577	0.00200878	0.00895921	0.00011047	0.0325766
Fragment3@22	2.8104	1304465000	0.0204502	2617310	0.0232751	0.00200631	0.00712634	0.000117556	0.0432145
Fragment3@23	2.7874	1287629000	0.01225	2584590	0.0168391	0.00200725	0.0110833	0.000118817	0.0321345
Fragment3@24	2.85257	1269502000	0.0134701	2548746	0.0147291	0.00200775	0.00787043	0.000124166	0.040371
Fragment3@25	2.82425	1120875000	0.427398	2262145	0.395882	0.00201825	0.037966	0.000109885	0.0377105
Fragment3@26	2.85648	1242859000	0.00733173	2493881	0.00992507	0.00200665	0.00724495	0.000123741	0.03741
Fragment3@27	2.84146	1248569000	0.132273	2506809	0.117594	0.00200803	0.0329592	0.000123424	0.0397697
Fragment3@28	2.83559	1224146000	0.069557	2460407	0.0594442	0.00200999	0.0180462	0.000121026	0.0425852
Fragment3@29	2.84874	1219111000	0.307954	2451720	0.28227	0.00201184	0.0455449	0.000115475	0.0405045
Fragment3@30	2.79523	1291568000	0.0174161	2593799	0.0218381	0.00200816	0.00821615	0.000121882	0.0299224
Fragment3@31	2.81971	1278909000	0.231501	2572120	0.212071	0.0020112	0.0331855	9.66871e-05	0.0348413
Fragment3@32	2.75235	1227346000	0.149792	2459203	0.133692	0.00200387	0.0301765	0.000108177	0.037837
Fragment3@33	2.84803	1240636000	0.132547	2489055	0.124594	0.00200716	0.0307773	0.000116382	0.0347329
KLB-1-opx
Fragment1@01	2.79945	1153693000	0.22309	2319545	0.208789	0.00201055	0.0341859	5.3308e-05	0.0452605
Fragment1@02	2.80101	1188958000	0.178405	2383859	0.220969	0.00200788	0.0320563	5.47394e-05	0.0614757
Fragment1@03	2.82002	1145465000	0.391072	2305914	0.351651	0.00201295	0.0519222	5.53455e-05	0.054981
Fragment1@04	2.81744	1208747000	0.309513	2428488	0.292729	0.00200792	0.038006	5.55221e-05	0.0475685
Fragment1@05	2.82323	1224698000	0.13854	2461993	0.134678	0.00201035	0.0128308	5.5328e-05	0.0432793
Fragment1@06	2.75885	1246731000	0.141425	2505201	0.124774	0.00200943	0.0317149	5.33991e-05	0.0467503
Fragment1@07	2.71136	1301164000	0.159261	2616559	0.14774	0.00201081	0.0292587	5.2772e-05	0.0425088
Fragment1@08	2.76174	1290337000	0.181233	2590248	0.180527	0.00200796	0.0243318	5.50188e-05	0.0566249
Fragment1@09	2.69892	1275262000	0.243968	2561003	0.246148	0.0020082	0.02315	5.4471e-05	0.0551225
Fragment1@10	2.80735	1291268000	0.0738956	2589793	0.0720564	0.00200664	0.0118142	5.6362e-05	0.0417387
Fragment1@11	2.78388	1270341000	0.116801	2552687	0.0996961	0.00200833	0.0272915	5.53667e-05	0.0437758
Fragment1@12	2.8115	1246307000	0.141585	2498658	0.131895	0.00200436	0.0191091	5.53787e-05	0.0499672
Fragment1@13	2.76683	1228069000	0.151831	2469529	0.124793	0.00200897	0.0346272	5.35647e-05	0.0721832
Fragment1@14	2.76636	1167659000	0.25749	2347810	0.222268	0.00200836	0.0220241	5.3245e-05	0.046321
Fragment1@15	2.82417	1293290000	0.151875	2591478	0.158756	0.00200523	0.0143997	5.50782e-05	0.0504242
Fragment1@16	2.8823	1316577000	0.250289	2645100	0.231095	0.00200833	0.0296375	5.55862e-05	0.146504
Fragment1@17	3.00473	1245986000	1.65103	2511902	1.66018	0.00201591	0.196521	5.88615e-05	1.14274
Fragment1@18	2.98126	1348941000	0.336145	2705617	0.303671	0.00200578	0.0405836	5.68513e-05	0.0465363
Fragment1@19	3.0372	1387010000	0.216686	2776776	0.201033	0.00200257	0.0262505	5.71561e-05	0.0622646
Fragment1@20	2.99675	1408256000	0.124208	2832952	0.0947859	0.00201103	0.0153072	5.48799e-05	0.041215
Fragment1@21	2.94582	1353872000	0.34147	2719657	0.321159	0.00200852	0.0277035	5.53324e-05	0.0677445
Fragment1@22	3.02147	1385759000	0.13326	2778977	0.113732	0.00200409	0.0137561	5.68481e-05	0.0408968
Fragment1@23	2.99073	1358104000	0.151453	2728249	0.1374	0.00200882	0.0243111	5.55987e-05	0.0436501
Fragment1@24	3.00324	1340090000	0.0169625	2688314	0.0217442	0.00200611	0.0115394	5.55942e-05	0.042003
Fragment2@01	2.97633	1355058000	0.0645535	2723291	0.0629013	0.00201001	0.0140306	5.55672e-05	0.0558281
Fragment2@02	2.99644	1344358000	0.129554	2698607	0.126795	0.00200736	0.0114326	6.09914e-05	0.0445874
Fragment2@03	2.92783	1306046000	0.0174693	2624095	0.0233071	0.00200901	0.0113156	5.47943e-05	0.042432
Fragment2@04	2.96021	1354212000	0.046362	2720285	0.0393254	0.00200849	0.00797927	5.77521e-05	0.143721
Fragment2@05	2.96358	1307967000	0.0213503	2627640	0.0194967	0.00200909	0.0070013	5.88676e-05	0.0410978
Fragment2@06	2.90201	1353930000	0.129086	2720015	0.118488	0.00200898	0.0173389	5.32329e-05	0.0425502
Fragment2@07	2.96413	1276736000	0.0106152	2563139	0.0154467	0.00200748	0.00872667	6.01373e-05	0.0444758
Fragment2@08	3.00395	1273079000	0.0424878	2557784	0.039207	0.00200907	0.007097	5.93727e-05	0.0462209
Fragment2@09	2.80039	1324261000	0.0670503	2654485	0.0604988	0.00200426	0.0136415	5.39614e-05	0.0419753
Fragment2@10	2.98079	1340872000	0.058453	2693723	0.0631456	0.0020088	0.0154602	6.05155e-05	0.0449797
Fragment2@11	2.94629	1362976000	0.171823	2736353	0.195398	0.00200998	0.02704	5.88094e-05	0.0402655
Fragment2@12	2.93424	1340036000	0.06042	2688660	0.0674216	0.00200663	0.0136228	5.57522e-05	0.0491137
Fragment2@13	2.90178	1366419000	0.0139132	2743161	0.018755	0.00200728	0.00718079	5.4243e-05	0.0415891
Fragment2@14	2.8823	1348695000	0.0952077	2707507	0.0872175	0.00200758	0.00989886	5.57193e-05	0.0574304
Fragment2@15	2.82613	1317908000	0.284709	2646366	0.276092	0.00200814	0.0213961	5.70868e-05	0.0410224
Fragment2@16	2.88378	1319713000	0.0301694	2648486	0.0286984	0.00200705	0.0118929	5.7642e-05	0.0431055
Fragment2@17	3.03367	1329346000	0.049002	2669677	0.0536531	0.00200836	0.0116683	6.1087e-05	0.0493131
Fragment2@18	2.85539	1229982000	1.03313	2451780	1.16045	0.00200631	0.0691378	5.57092e-05	1.14007
Fragment2@19	2.88089	1337295000	0.058522	2683282	0.0440788	0.00200582	0.00883478	5.75163e-05	0.0472662
Fragment2@20	2.8593	1305152000	0.0170089	2617760	0.0240306	0.00200591	0.0139499	5.39327e-05	0.0424961
Fragment3@01	2.8133	1200825000	0.0797932	2411156	0.0835871	0.00200862	0.0106714	5.44056e-05	0.0450879
Fragment3@02	2.828	1219715000	0.127654	2450566	0.127902	0.00200926	0.0132622	5.72022e-05	0.0530805
Fragment3@03	2.77535	1192498000	0.610553	2399567	0.55673	0.00201145	0.0969982	5.45932e-05	0.0775076
Fragment3@04	2.82206	1201056000	0.190773	2403185	0.200797	0.00200069	0.0251061	5.46896e-05	0.0848182
Fragment3@05	2.70925	1230694000	0.181318	2472871	0.168887	0.00200862	0.0185055	5.19322e-05	0.0461192
Fragment3@06	2.67811	1258338000	0.0156422	2526924	0.0185415	0.00200814	0.0109274	5.50145e-05	0.0446512
Fragment3@07	2.68899	1210095000	0.421797	2431714	0.41248	0.00200954	0.0475476	5.6629e-05	0.0711385
Fragment3@08	2.66301	1202085000	1.16431	2411783	1.1401	0.00200646	0.081939	5.53189e-05	0.163208
Fragment3@09	2.72795	1212458000	0.33086	2436728	0.313691	0.00200937	0.0293345	5.50114e-05	0.0650698
Fragment3@10	2.86203	1179831000	0.168827	2371699	0.156229	0.00201021	0.0285851	5.55713e-05	0.0509454
Fragment3@11	2.70119	1153056000	0.165146	2314090	0.142423	0.00200694	0.0477692	5.45322e-05	0.0443949
Fragment3@12	2.69384	1189230000	0.241883	2390773	0.184129	0.00200753	0.0262619	5.59018e-05	0.0431563
Fragment3@13	2.57023	1128807000	0.615756	2261342	0.681812	0.00200492	0.0187866	5.29345e-05	0.514289
Fragment3@14	2.68633	1145586000	0.0141046	2297494	0.0145558	0.00200552	0.00971303	5.585e-05	0.0439361
Fragment3@15	2.6972	1199456000	0.0158001	2405238	0.0188937	0.00200521	0.0112179	5.54944e-05	0.0464592
Fragment3@16	2.68187	1191106000	0.0180238	2390629	0.0241572	0.00200707	0.0107382	5.55224e-05	0.0431802
06JY31-opx
Fragment1@01	4.3234	989770700	0.0584735	1996915	0.0659907	0.00201755	0.016685	2.90872e-05	0.273652
Fragment1@02	4.24704	912191200	0.0379505	1837460	0.0396332	0.00201434	0.0145319	2.83013e-05	0.0801526
Fragment1@03	4.27912	860343300	0.0461817	1735977	0.0473462	0.00201777	0.0161249	2.8999e-05	0.0817509
Fragment1@04	4.3169	924907500	0.226734	1864026	0.242784	0.00201535	0.0285203	2.83489e-05	0.0923248
Fragment1@05	4.30939	918665700	0.0834013	1851736	0.0865442	0.00201568	0.013513	2.83016e-05	0.0698772
Fragment1@06	4.27208	957470400	0.167012	1931835	0.170261	0.00201764	0.0163139	2.8891e-05	0.0650761
Fragment1@07	4.27333	925629000	0.0860853	1866056	0.0902295	0.00201599	0.0130735	2.89618e-05	0.0631123
Fragment1@08	4.27982	930270100	0.0997355	1876907	0.102368	0.00201759	0.0107242	2.85757e-05	0.0605034
Fragment1@09	4.28655	916845000	0.0635783	1848563	0.0642798	0.00201622	0.0136721	2.85591e-05	0.0609569
Fragment1@10	4.28467	923667200	0.0697818	1862892	0.0706854	0.00201684	0.0159421	2.9025e-05	0.0739196
Fragment2@1	4.07798	1044065000	0.0558422	2111027	0.0591189	0.00202193	0.0258144	2.82502e-05	0.0579551
Fragment2@2	4.10185	1022639000	0.0568007	2066800	0.0598147	0.00202105	0.0154902	2.8418e-05	0.0607944
Fragment2@3	4.10771	1021980000	0.0567376	2065907	0.0589442	0.00202147	0.0121191	2.84527e-05	0.135764
Fragment2@4	4.2332	953696900	0.0458042	1923346	0.0445863	0.00201673	0.0108761	2.79616e-05	0.0672624
Fragment2@5	4.24681	954949100	0.0497718	1926172	0.0545156	0.00201704	0.0156821	2.78726e-05	0.0608973
Fragment2@6	4.2332	964034800	0.0684691	1944784	0.0690094	0.00201734	0.013913	2.84824e-05	0.0601255
Fragment3@1	4.23335	983151200	0.0588182	1983797	0.0605494	0.00201779	0.0150995	2.92934e-05	0.0624376
Fragment3@2	4.24297	992371200	0.0998138	2002291	0.103377	0.00201768	0.0139952	2.9169e-05	0.0671379
Fragment3@3	4.23304	955948000	0.0731465	1928731	0.0728211	0.00201761	0.0096849	2.93817e-05	0.0731086
Fragment3@4	4.24141	961569300	0.028441	1939126	0.0321517	0.00201663	0.0129964	2.87894e-05	0.0599626
Fragment3@5	4.21747	995979300	0.0693457	2007888	0.0677912	0.002016	0.0130016	2.95473e-05	0.0583493
Fragment4@1	4.23656	991506300	0.0736278	2000828	0.0752261	0.00201797	0.0119852	2.8948e-05	0.0703347
Fragment4@2	4.24071	977899400	0.0575061	1972064	0.0622177	0.00201663	0.0166832	2.82141e-05	0.0599087
Fragment4@3	4.09199	1013371000	0.0941669	2046055	0.0978916	0.00201906	0.0180741	2.79253e-05	0.0590776
Fragment4@4	4.14988	1019884000	0.0567066	2060889	0.0540508	0.00202071	0.0140564	2.8288e-05	0.0586078
Fragment4@5	4.14965	1008619000	0.0475202	2038025	0.0468957	0.00202061	0.0155496	2.86959e-05	0.0586206
Fragment4@6	4.16248	1016025000	0.0409287	2052393	0.0402968	0.00202002	0.00980336	2.88646e-05	0.0582794
Fragment4@7	4.14628	1008162000	0.074737	2037078	0.0748186	0.00202059	0.0112057	2.89433e-05	0.0584464
Fragment4@8	4.14738	999646300	0.0594108	2018852	0.0656068	0.00201957	0.0206021	2.89213e-05	0.0757322
Fragment5@1	4.15285	1036869000	0.0438142	2096650	0.0474715	0.0020221	0.0118805	2.79648e-05	0.0583748
Fragment5@2	4.14542	1044431000	0.0556694	2111565	0.0614702	0.00202174	0.0166878	2.83353e-05	0.0598588
Fragment5@9	4.1081	1020533000	0.0719901	2063175	0.069543	0.00202167	0.0129931	2.9209e-05	0.066541
Fragment5@3	4.14026	1036102000	0.0482606	2094239	0.0479332	0.00202127	0.0106011	2.85919e-05	0.0599497
Fragment5@5	4.13322	1027207000	0.0272645	2075083	0.0261071	0.00202012	0.0133784	2.82108e-05	0.0584582
Fragment5@6	4.12297	1038749000	0.0827308	2097646	0.0822405	0.0020194	0.0105259	2.85207e-05	0.0578977
Fragment5@10	4.11585	1021661000	0.10013	2065428	0.101719	0.00202164	0.0138907	2.96746e-05	0.162023
Fragment5@7	4.14698	1019195000	0.0627006	2061343	0.066733	0.00202252	0.0122004	2.87253e-05	0.0645672
Fragment5@8	4.14393	1003262000	0.0627879	2028952	0.0706963	0.00202235	0.0211362	2.88553e-05	0.0663823
Fragment5@4	4.1401	1033120000	0.0923336	2087687	0.0935257	0.00202076	0.0122936	2.86541e-05	0.0579541
Fragment5@11	4.13087	998914400	0.0948045	2018975	0.0957042	0.00202117	0.0154794	2.93963e-05	0.06016
Ens-s-opx
Fragment1@01	1.76484	862562900	0.0234396	1729032	0.0306559	0.0020048	0.00984624	2.45246e-05	0.0895846
Fragment1@02	1.74215	897456900	0.0205794	1799081	0.0214876	0.00200429	0.011371	2.37535e-05	0.0853552
Fragment1@03	1.76719	877239900	0.0162487	1756581	0.0210988	0.0020025	0.0104338	2.45291e-05	0.0738952
Fragment1@04	1.70984	925341000	0.00880735	1853472	0.012707	0.00200276	0.0122445	2.37523e-05	0.0867022
Fragment1@05	1.71892	909636600	0.0138037	1822057	0.0121904	0.00200324	0.00950449	2.38741e-05	0.0733345
Fragment1@06	1.73308	904409600	0.00601783	1811335	0.0134597	0.00200294	0.00996521	2.40619e-05	0.0796377
Fragment1@07	1.75271	893945200	0.0203169	1790482	0.0249363	0.002003	0.00848828	2.40798e-05	0.0848313
Fragment1@08	1.74121	880091000	0.00685405	1763174	0.0141256	0.00200346	0.012601	2.38941e-05	0.208784
Fragment1@09	1.72392	871971800	0.0107197	1746130	0.0138589	0.00200285	0.00982925	2.39807e-05	0.0953962
Fragment1@10	1.75162	876270900	0.0100338	1755701	0.0118808	0.00200333	0.00940972	2.44304e-05	0.0742047
Fragment1@11	1.73057	928276500	0.01741	1860501	0.0237562	0.00200442	0.00832543	2.33176e-05	0.0916427
Fragment1@12	1.70945	887020400	0.0254492	1776977	0.0298103	0.00200331	0.0128449	2.39841e-05	0.0742571
Fragment1@13	1.76539	894739700	0.00932271	1791557	0.0168144	0.00200239	0.0139474	2.38706e-05	0.0985933
Fragment1@14	1.74841	909038800	0.0281002	1819350	0.0345043	0.00200179	0.0100624	2.38497e-05	0.0733842
Fragment1@15	1.75123	917572000	0.0135514	1836786	0.0140544	0.00200191	0.00946884	2.37741e-05	0.0951074
Fragment1@16	1.69138	896738100	0.0081528	1794974	0.0157529	0.00200179	0.0119108	2.46439e-05	0.0728402
Fragment1@17	1.70601	942324300	0.0121932	1888751	0.0146148	0.00200453	0.0144942	2.3654e-05	0.0723595
Fragment1@18	1.69592	911450200	0.00890429	1826483	0.0157372	0.00200388	0.0125023	2.37509e-05	0.073401
Fragment1@19	1.70562	916142000	0.00816248	1834789	0.0154863	0.00200314	0.0124161	2.35877e-05	0.0763288
Fragment1@20	1.67245	900481100	0.0125551	1803184	0.0168909	0.00200223	0.0144867	2.44611e-05	0.082655
Fragment1@21	1.7039	912293100	0.0143406	1826216	0.0186223	0.00200187	0.00861034	2.36862e-05	0.0734683
Fragment1@22	1.69576	897572300	0.00818506	1797015	0.0118561	0.00200215	0.00868048	2.37781e-05	0.0739494
Fragment1@23	1.68864	877944100	0.0269573	1755710	0.0392654	0.00200012	0.0172624	2.41256e-05	0.0897413
Fragment1@24	1.69302	896281300	0.0179013	1793403	0.0269486	0.00200094	0.0144175	2.43807e-05	0.0731885
Fragment1@25	1.66197	911266800	0.00757087	1823841	0.0139442	0.00200144	0.0122424	2.44927e-05	0.110359
Fragment2@01	1.71313	858250200	0.0142989	1719614	0.0239854	0.00200363	0.0162907	2.50218e-05	0.0788576
Fragment2@02	1.65931	898210900	0.0132898	1802651	0.0141931	0.00200701	0.00845967	2.44458e-05	0.0780037
Fragment2@03	1.69514	902211300	0.0106051	1807982	0.0154981	0.00200387	0.012301	2.49811e-05	0.0795111
Fragment2@04	2.48097	1209409000	0.0135934	2422705	0.0174879	0.00200329	0.00753936	2.26226e-05	0.0668696
Fragment2@05	1.67573	886865100	0.00921983	1774994	0.0147499	0.00200141	0.0119145	2.47437e-05	0.0749184
Fragment2@06	1.64069	903892400	0.029277	1810320	0.0324183	0.0020028	0.0103559	2.4278e-05	0.0946508
Fragment2@07	1.67714	900991400	0.0206027	1803407	0.0228313	0.00200136	0.00845822	2.34179e-05	0.0762273
Fragment2@08	1.66408	929391600	0.0152034	1862529	0.0164958	0.00200403	0.00943148	2.41376e-05	0.0740127
Fragment2@09	2.50929	1193196000	0.0130262	2390394	0.020701	0.00200311	0.0120569	2.27309e-05	0.0671669
Fragment2@10	1.66846	889269200	0.0337151	1780656	0.0354776	0.00200238	0.00955303	2.49096e-05	0.0746009
Fragment2@11	1.67691	940238000	0.00566316	1882849	0.0151393	0.00200244	0.0110166	2.3803e-05	0.0740957
Fragment2@12	1.68559	917848000	0.0124914	1835937	0.0164304	0.00200037	0.0104622	2.44904e-05	0.0739947
Fragment2@13	1.97559	1199300000	0.0106106	2404967	0.0150465	0.00200551	0.00930909	2.24956e-05	0.067337
Fragment2@14	1.69459	912639400	0.00955472	1827088	0.0142564	0.00200198	0.00912925	2.41969e-05	0.0755941
Fragment2@15	1.68653	904772400	0.0100672	1811849	0.0139027	0.00200259	0.00878603	2.40437e-05	0.0751627
Fragment2@16	1.69232	883040100	0.0113336	1766359	0.0202105	0.00200055	0.0162864	2.37308e-05	0.0765417
Fragment2@17	1.68356	876816000	0.0169422	1754984	0.0216953	0.0020014	0.0115491	2.45404e-05	0.0773334
Fragment2@18	2.48825	1168475000	0.0138332	2340260	0.012244	0.00200272	0.0112127	2.26977e-05	0.0679135
Fragment2@19	1.63544	854634000	0.0113466	1712196	0.0182408	0.00200316	0.0157623	2.48775e-05	0.0785726
Fragment2@20	1.61542	996694100	0.116625	1997165	0.115531	0.00200305	0.0112956	2.35611e-05	0.0976305
Fragment2@21	1.63106	881381500	0.00972636	1765112	0.0192142	0.00200255	0.0117549	2.44571e-05	0.0818066
Fragment2@22	1.63302	879642300	0.0125704	1760260	0.0187267	0.00200132	0.00954061	2.41015e-05	0.0761433
Fragment2@23	2.46892	1170447000	0.0140189	2348315	0.018064	0.00200634	0.00863023	2.22867e-05	0.0814915
Fragment2@24	2.51688	1140687000	0.010109	2282852	0.0137207	0.0020013	0.0118115	2.31433e-05	0.0681477
Fragment2@25	2.49709	1264367000	0.0911345	2533789	0.0955899	0.00200388	0.00754491	2.2821e-05	0.0668751
Fragment2@26	2.46298	1219245000	0.0133203	2443541	0.0171518	0.00200423	0.00755106	2.43509e-05	0.072377
Fragment2@27	2.49317	1198357000	0.0702368	2398765	0.0686428	0.00200202	0.0107135	2.49439e-05	0.0706072
Fragment2@28	2.4701	1185769000	0.020291	2372033	0.0239421	0.00200067	0.0129419	2.24894e-05	0.0777283
Fragment2@29	2.43301	1203746000	0.0698178	2411476	0.0744991	0.0020033	0.00990999	2.49619e-05	0.0845136
Fragment2@30	2.47487	1186935000	0.017899	2377553	0.0212224	0.00200338	0.00736048	2.53286e-05	0.0687575
Fragment3@01	2.53894	1108941000	0.0720346	2222342	0.065242	0.00200402	0.0102835	2.53286e-05	0.0673776
Fragment3@02	2.48026	1187766000	0.110404	2380022	0.106774	0.00200351	0.00779354	2.32555e-05	0.0665858
Fragment3@03	2.51312	1177496000	0.0108347	2359262	0.0137734	0.00200365	0.00990424	2.50759e-05	0.0714115
Fragment3@04	2.50147	1187073000	0.0199118	2378023	0.0215344	0.0020035	0.0120789	2.28676e-05	0.0671654
Fragment3@05	2.51782	1162689000	0.00762448	2328780	0.0177557	0.00200298	0.0137139	2.54018e-05	0.0665901
Fragment3@06	2.47307	1196534000	0.0138457	2398706	0.0175922	0.00200458	0.00768764	2.30995e-05	0.0665872
Fragment3@07	2.46024	1209462000	0.014405	2424091	0.0154556	0.00200446	0.00937155	2.32335e-05	0.0717988
Fragment3@08	2.39734	1193186000	0.0288751	2388178	0.0311111	0.00200151	0.0103782	2.53087e-05	0.0774637
Fragment3@09	2.39609	1142456000	0.0172067	2287153	0.0232564	0.00200217	0.00772594	2.44447e-05	0.0664041
Fragment3@10	2.3594	1156936000	0.0281357	2315272	0.0264283	0.00200129	0.00823444	2.16051e-05	0.0698108
Fragment3@12	2.29603	1170492000	0.0191711	2344441	0.0256798	0.00200283	0.011851	2.29424e-05	0.0675399
Fragment3@13	2.27029	1187156000	0.127265	2377030	0.14235	0.00200182	0.0117746	2.26533e-05	0.0673485
Fragment3@14	2.24831	1080896000	0.012213	2164820	0.023663	0.0020031	0.0140154	2.56648e-05	0.0836873
Fragment3@15	2.25347	1181961000	0.0288494	2366958	0.0358367	0.00200243	0.00955592	2.28707e-05	0.0672913
Fragment3@16	2.26693	1168812000	0.0273205	2340237	0.027874	0.00200224	0.00839909	2.3089e-05	0.0673625
Fragment3@17	2.29908	1161602000	0.024572	2326025	0.0290944	0.00200243	0.010214	2.29837e-05	0.0677202
Fragment3@18	2.2839	1142308000	0.0283841	2285901	0.0303222	0.00200124	0.0106782	2.27333e-05	0.0686372
Fragment3@19	2.25989	1156896000	0.0250441	2316710	0.0293934	0.00200252	0.0111606	2.35584e-05	0.0671173
Fragment3@20	2.39781	1125949000	0.0243904	2252559	0.0283244	0.00200059	0.00869186	2.38734e-05	0.0676069
Fragment3@21	2.20724	1113524000	0.0256208	2229268	0.0277422	0.00200239	0.00884251	2.42219e-05	0.0684429
Fragment3@22	2.19808	1139191000	0.0299735	2281394	0.0281894	0.00200221	0.00914855	2.37899e-05	0.0673344
Fragment3@23	2.26873	1146122000	0.019554	2296005	0.024929	0.00200338	0.00966343	2.36818e-05	0.0700241
Fragment3@24	2.26474	1132499000	0.0223817	2267750	0.0331383	0.00200271	0.0161819	2.35614e-05	0.0678421
Fragment3@25	2.22906	1061103000	0.0249138	2124034	0.027384	0.00200181	0.00778953	2.49823e-05	0.0681952
Fragment3@26	2.24901	1127023000	0.00790011	2257228	0.0128196	0.00200282	0.00785352	2.22581e-05	0.0697952
Fragment3@27	2.23947	1124299000	0.0115313	2250827	0.0167336	0.00200186	0.00917146	2.30312e-05	0.0699613
Fragment3@28	2.19895	1160670000	0.0352733	2325513	0.0368906	0.00200351	0.00743585	2.27525e-05	0.0680159
Fragment3@29	2.20059	1135525000	0.0237665	2273227	0.0257961	0.00200204	0.00859553	2.47643e-05	0.0661073
Fragment3@30	2.28727	1155731000	0.0188762	2312410	0.0190329	0.00200091	0.00746391	2.30279e-05	0.0678572
Fragment3@31	2.23524	1125388000	0.0220712	2254958	0.0291428	0.00200372	0.0129812	2.27793e-05	0.0691116
Fragment3@32	2.22468	1116556000	0.036866	2233901	0.0444194	0.00200071	0.011704	2.15742e-05	0.0711306
Ens-t-opx
Fragment1@01	2.58048	1109180000	0.0195049	2257367	0.0152375	0.00203505	0.00774116	9.9474e-06	0.100016
Fragment1@02	2.56522	1114710000	0.0422784	2268124	0.0378714	0.00203456	0.00978509	1.02806e-05	0.115609
Fragment1@03	2.5477	1140655000	0.138816	2318570	0.024865	0.00203548	0.0142672	1.01385e-05	0.147456
Fragment1@04	2.5355	1158410000	0.0623593	2359359	0.0661274	0.00203658	0.00910238	1.01132e-05	0.11574
Fragment1@05	2.57344	1161974000	0.0155164	2365863	0.0188353	0.00203569	0.00950051	1.01622e-05	0.10155
Fragment1@06	2.56601	1171759000	0.0361906	2386444	0.0380261	0.00203671	0.0104949	1.01877e-05	0.0963143
Fragment1@07	2.56069	1152782000	0.0315127	2345554	0.0327972	0.00203465	0.00741154	1.02162e-05	0.104354
Fragment1@08	2.54981	1147339000	0.0175908	2335710	0.0160794	0.00203584	0.0078554	1.01902e-05	0.0972604
Fragment1@09	2.50491	1144924000	0.0155695	2329474	0.021668	0.00203477	0.00915396	1.02203e-05	0.0969962
Fragment1@10	2.46446	1141579000	0.0314055	2322811	0.0345024	0.00203457	0.0123806	1.01009e-05	0.116102
Fragment1@11	2.47659	1157231000	0.0741951	2355070	0.0745807	0.00203498	0.0107787	1.01709e-05	0.123324
Fragment1@12	2.50201	1162852000	0.0264926	2366170	0.0276807	0.00203459	0.0116506	1.01395e-05	0.10956
Fragment1@13	2.51304	1163894000	0.0156785	2369550	0.0178577	0.00203585	0.00860131	1.02033e-05	0.13346
Fragment1@14	2.48582	1164431000	0.0110515	2371443	0.0185721	0.00203673	0.0107211	1.01992e-05	0.144185
Fragment1@15	2.46376	1184869000	0.0200543	2411223	0.0240551	0.00203537	0.00730831	9.88243e-06	0.16259
Fragment1@16	2.49302	1165426000	0.00728799	2372060	0.0126504	0.00203536	0.0112183	9.98603e-06	0.117814
Fragment1@17	2.48848	1173927000	0.0211931	2389916	0.022226	0.00203583	0.0087993	1.01244e-05	0.0960832
Fragment1@18	2.51391	1158374000	0.0144947	2357600	0.0170026	0.00203527	0.0102914	1.01625e-05	0.0967198
Fragment1@19	2.48034	1155760000	0.0390631	2352571	0.0349822	0.00203525	0.01309	1.0128e-05	0.156997
Fragment1@20	2.49091	1157575000	0.0318231	2355615	0.0362602	0.00203484	0.0101755	1.01007e-05	0.108505
Fragment1@21	2.46783	1134649000	0.0224416	2308154	0.0230744	0.00203425	0.00875089	1.0103e-05	0.097745
Fragment1@22	2.44514	1144176000	0.0291486	2329473	0.0314827	0.00203601	0.00743652	1.0138e-05	0.132125
Fragment1@23	2.42003	1125633000	0.0122013	2290180	0.0185156	0.00203428	0.0106562	1.01476e-05	0.0977329
Fragment1@24	2.43075	1137339000	0.043859	2314670	0.0431256	0.00203503	0.00886804	1.01915e-05	0.097151
Fragment1@25	2.47103	1130432000	0.00636534	2299988	0.0115387	0.00203459	0.00941984	1.00847e-05	0.0980442
Fragment1@26	2.46806	1141152000	0.0153756	2322766	0.0131757	0.00203569	0.00822511	1.00996e-05	0.124735
Fragment1@27	2.43309	1043039000	0.00923094	2124517	0.0137468	0.00203675	0.00953823	1.04137e-05	0.126615
Fragment1@28	2.46658	1115903000	0.0120479	2269766	0.0167921	0.00203388	0.0124242	9.93584e-06	0.302924
Fragment1@29	2.45742	1119889000	0.0524172	2278542	0.05246	0.00203473	0.00934085	1.01781e-05	0.0980758
Fragment1@30	2.45515	1087876000	0.0333472	2214827	0.0372909	0.00203602	0.00919206	1.03071e-05	0.0989831
Fragment1@31	2.39413	1067990000	0.00530717	2172296	0.00996824	0.00203415	0.0077019	1.02295e-05	0.099894
Fragment1@32	2.36159	1103439000	0.0309476	2248126	0.0319356	0.00203738	0.0101327	9.968e-06	0.0991397
Fragment1@33	2.42284	1099565000	0.0302833	2237919	0.0343381	0.00203561	0.00871517	9.98502e-06	0.0995702
Fragment1@34	2.40164	1098399000	0.0123566	2235759	0.0180029	0.00203537	0.00802342	1.00174e-05	0.0994016
Fragment1@35	2.39945	1056579000	0.0274977	2150218	0.0300845	0.00203507	0.010904	1.03057e-05	0.1469
Fragment1@36	2.37231	1085472000	0.0103745	2208781	0.012157	0.00203501	0.00763796	1.00303e-05	0.134619
Fragment1@37	2.33045	1079914000	0.0155023	2196742	0.0200621	0.00203397	0.0113443	1.00258e-05	0.0998243
Fragment1@38	2.31105	1077962000	0.0147808	2194198	0.0182969	0.00203535	0.00766345	1.00735e-05	0.123407
Fragment1@39	2.29251	1080231000	0.0103396	2198902	0.0138383	0.00203566	0.0131767	9.96419e-06	0.0998717
Fragment1@40	2.28257	1091352000	0.0119464	2220877	0.012825	0.00203496	0.00761706	9.91417e-06	0.106675
Fragment1@41	2.30025	1081658000	0.0171092	2202358	0.0227386	0.0020362	0.0101476	9.91952e-06	0.107174
Fragment1@42	2.28312	1087652000	0.0216073	2214712	0.0241444	0.00203611	0.0107932	9.93421e-06	0.12132
Fragment1@43	2.27475	1090045000	0.0114095	2218946	0.0145893	0.00203582	0.00985902	9.93517e-06	0.0994707
Fragment1@44	2.24839	1095495000	0.0355155	2230789	0.0298059	0.00203642	0.0108864	9.97974e-06	0.113059
Fragment1@45	2.27115	1120016000	0.00901383	2280970	0.0125175	0.00203642	0.00920481	9.64643e-06	0.115872
Fragment1@46	2.27655	1117579000	0.0271095	2277361	0.0284901	0.00203762	0.00963761	9.7494e-06	0.0990481
Fragment1@47	2.29118	1103507000	0.0650853	2246765	0.0677405	0.00203614	0.0111936	1.01074e-05	0.0982772
Fragment1@48	2.30753	1097070000	0.00515129	2234022	0.0132267	0.00203628	0.0103723	1.00219e-05	0.099006
Fragment1@49	2.31254	1075680000	0.0144076	2190241	0.0178492	0.00203643	0.00767041	9.97592e-06	0.100494
Fragment1@50	2.29087	1078096000	0.0256148	2193064	0.0272748	0.00203436	0.0126843	9.98578e-06	0.135001
Fragment1@51	2.29259	1071918000	0.015699	2181320	0.0208017	0.00203498	0.00785198	1.00349e-05	0.112885
Fragment1@52	2.26935	1069647000	0.0413374	2175858	0.0385695	0.00203407	0.00948413	9.97948e-06	0.100239
Fragment1@53	2.27225	1060755000	0.0142652	2158967	0.0144089	0.00203529	0.00963103	9.99973e-06	0.100619
Fragment1@54	2.27843	1051624000	0.011773	2141193	0.0191402	0.00203581	0.0105143	9.98429e-06	0.101114
Fragment1@55	1.97113	960812600	0.0136698	1956595	0.0188489	0.00203628	0.0107406	1.03477e-05	0.102799
Fragment1@56	2.2595	1060948000	0.0177359	2160281	0.0199401	0.00203594	0.00772418	9.92329e-06	0.100831
Fragment1@57	2.32404	1027516000	0.0239134	2091025	0.0262597	0.00203506	0.00967304	1.01472e-05	0.127422
Fragment1@58	2.30651	981081200	0.0148473	1997572	0.0153559	0.00203582	0.00856694	1.02204e-05	0.122425
Fragment1@59	2.28023	1016319000	0.0148403	2068057	0.0186551	0.00203474	0.00789531	1.01012e-05	0.102383
Fragment1@60	2.25864	995879800	0.00867587	2026551	0.0165244	0.00203462	0.0117764	1.01158e-05	0.109122
Fragment1@61	2.14207	988973700	0.011117	2012225	0.0224016	0.00203462	0.0136312	1.00805e-05	0.103217
Fragment1@62	2.07049	985508900	0.0132164	2005022	0.0188857	0.00203464	0.008318	1.00299e-05	0.103273
Fragment1@63	2.03568	982254600	0.0131725	1999952	0.0213568	0.00203584	0.0118583	1.00448e-05	0.11036
Fragment1@64	2.01041	985073500	0.0156171	2005063	0.0183057	0.00203544	0.00840364	1.00828e-05	0.124334
Fragment1@65	1.99883	980868300	0.0210426	1997127	0.0254497	0.00203657	0.0122278	1.01604e-05	0.139626
Fragment1@66	1.97755	986905300	0.0258128	2009847	0.0341901	0.00203667	0.0110746	1.03481e-05	0.140841
Fragment1@67	1.97411	969455300	0.0334172	1974140	0.0330599	0.00203634	0.00952488	1.01937e-05	0.102999
Fragment1@68	1.9946	966082600	0.0116214	1966411	0.0161491	0.00203549	0.00992079	1.01575e-05	0.115769
Fragment1@69	1.98874	962449400	0.0177764	1959085	0.0224504	0.0020357	0.00817657	1.01337e-05	0.103686
Fragment1@70	1.98498	959285200	0.0128219	1952539	0.0152276	0.00203545	0.0118329	1.01465e-05	0.143694
Fragment1@71	2.0151	944812900	0.0242371	1926298	0.02502	0.00203907	0.00956932	1.0428e-05	0.103629
Fragment2@01	2.00313	927616200	0.0137223	1887771	0.0184894	0.00203501	0.0110733	1.0488e-05	0.107755
Fragment2@02	2.03083	975923000	0.0241757	1986930	0.0277737	0.00203607	0.0102994	1.02226e-05	0.105517
Fragment2@03	1.97732	967876600	0.0185487	1971271	0.0181908	0.00203678	0.0118431	1.00605e-05	0.107958
Fragment2@04	1.99304	968318000	0.064369	1972200	0.0705301	0.00203673	0.0149967	1.00152e-05	0.1077
Fragment2@05	1.98248	995576900	0.0545074	2024779	0.0613208	0.00203404	0.0144534	9.7985e-06	0.107495
Fragment2@06	1.97121	957976300	0.0110344	1949501	0.0132225	0.00203519	0.0116771	1.00675e-05	0.108628
Fragment2@07	1.99875	963811200	0.0255287	1959516	0.0273344	0.00203318	0.00811184	9.9975e-06	0.107968
Fragment2@08	1.95025	953930500	0.0226643	1941231	0.0306856	0.00203537	0.0126687	1.01799e-05	0.115563
Fragment2@09	1.8462	967603000	0.0266549	1968235	0.0246502	0.00203389	0.0080943	9.5654e-06	0.128536
Fragment2@10	1.98177	961919700	0.0180213	1957297	0.0269494	0.00203506	0.0135778	1.01462e-05	0.127283
Fragment2@11	1.9504	992313300	0.0179311	2019008	0.016652	0.00203501	0.00841233	9.9691e-06	0.126151
Fragment2@12	1.96089	995896500	0.0212526	2026208	0.0210841	0.00203456	0.0113461	9.9423e-06	0.107363
Fragment2@13	1.91653	955334400	0.0400388	1942969	0.0464138	0.00203382	0.01041	1.02897e-05	0.108939
Fragment2@14	1.96237	983876600	0.00960272	2001585	0.0157715	0.00203435	0.0122043	9.9267e-06	0.108016
Fragment2@15	1.95033	997886100	0.0147618	2031029	0.0182575	0.00203526	0.0108908	1.00089e-05	0.161586
Fragment2@16	1.95784	1001763000	0.0653601	2039696	0.0658497	0.00203597	0.0139219	9.9533e-06	0.112308
Fragment2@17	1.97622	998745600	0.0139909	2033402	0.0175225	0.00203585	0.00933336	9.8268e-06	0.107312
Fragment2@18	1.9727	983760700	0.0110838	2001753	0.0191415	0.00203491	0.012602	9.8864e-06	0.107944
Fragment2@19	1.86889	953981900	0.0293574	1939507	0.0336202	0.00203318	0.0102174	1.04005e-05	0.137838
Fragment2@20	1.95909	967887600	0.0141343	1968430	0.0144485	0.00203361	0.0107355	9.9611e-06	0.108865
Fragment2@21	1.95173	969364100	0.0133167	1972053	0.0161786	0.00203433	0.0114312	9.9557e-06	0.167428
Fragment2@22	1.95643	990976800	0.0205212	2016983	0.0271082	0.00203528	0.0101905	1.00183e-05	0.107229
Fragment2@23	1.96847	947421800	0.0230082	1928424	0.023426	0.00203532	0.00971014	9.8575e-06	0.11033
Fragment2@24	1.88078	960264000	0.00920582	1953201	0.0179843	0.00203411	0.010083	1.03138e-05	0.109462
Fragment2@25	1.7747	934160400	0.0269485	1899135	0.0286535	0.00203316	0.00951887	1.00425e-05	0.115208
Fragment2@26	1.86333	959402800	0.011235	1952066	0.0138824	0.00203451	0.0114023	1.03745e-05	0.109712
Fragment2@27	1.81608	964818100	0.0207247	1963568	0.0293263	0.00203504	0.016108	9.7442e-06	0.117056
Fragment2@28	1.94618	999927500	0.0235658	2034111	0.0238555	0.00203444	0.0090842	1.00953e-05	0.106787
Fragment2@29	1.81225	941530900	0.00843451	1915056	0.0141411	0.00203407	0.0112999	9.8163e-06	0.142392
Fragment2@30	1.82844	916074700	0.0290472	1861588	0.0329703	0.00203178	0.0127639	9.8033e-06	0.116054
Fragment2@31	1.75921	920359600	0.0103359	1871942	0.0141377	0.0020338	0.0101835	1.00628e-05	0.122426
Fragment2@32	1.89674	953781100	0.020447	1939525	0.0199076	0.00203338	0.0123273	1.03299e-05	0.109448
Fragment2@33	1.74927	938562500	0.0105264	1909477	0.0176344	0.00203447	0.0130925	1.00294e-05	0.115721
Fragment2@34	1.78541	945179900	0.0221539	1921216	0.0268735	0.00203264	0.0140141	9.9186e-06	0.114919
Fragment2@35	1.74708	936344500	0.0121141	1904814	0.0189206	0.00203416	0.0102115	1.01867e-05	0.133678
116610-5 (SLP-142 )
Point@01	3.26219	1096975000	0.256774	2231204	0.266852	0.00203395	0.0185947	6.86789e-05	0.0598653
Point@02	3.27596	1090315000	0.0328521	2216951	0.0341163	0.00203331	0.0141624	7.06934e-05	0.0609053
Point@03	3.26195	1088511000	0.0385835	2210830	0.0382429	0.00203106	0.00754428	7.74547e-05	0.0490069
Point@04	3.2704	1090847000	0.337865	2216059	0.34268	0.0020315	0.0224226	7.81005e-05	0.0487695
Point@05	3.27072	1096291000	0.043845	2224961	0.0460291	0.00202953	0.0141818	7.64632e-05	0.0546649
Point@06	3.80238	1063957000	0.339715	2155492	0.338307	0.00202592	0.0240614	7.66463e-05	0.0548601
Point@07	3.78579	1052258000	0.0685893	2133035	0.0722719	0.0020271	0.0105526	7.43863e-05	0.0553597
Point@08	3.76576	1045533000	0.0853344	2117070	0.0839779	0.00202487	0.0141781	7.80383e-05	0.0498304
Point@09	3.74769	1007693000	0.0341624	2040568	0.038213	0.00202499	0.0139359	7.51792e-05	0.0516271
Point@10	3.74222	1013678000	0.0611519	2052204	0.0601848	0.00202451	0.0150051	6.89771e-05	0.0615656
Point@11	3.74511	1009179000	0.0498935	2041919	0.0506504	0.00202335	0.0117183	6.90254e-05	0.0632716
Point@12	3.76639	1055403000	0.342492	2136728	0.342384	0.00202456	0.0183724	7.44693e-05	0.0630391
Point@13	3.73963	1037203000	0.102404	2101046	0.103385	0.00202568	0.0103336	7.51697e-05	0.0508919
Point@14	3.71984	1011573000	0.0458988	2049370	0.0527867	0.00202592	0.0200652	6.64919e-05	0.0569938
Point@15	3.74699	1037922000	0.05561	2103819	0.0611656	0.00202695	0.0165399	6.67112e-05	0.115253
Point@16	3.72712	1048412000	0.273274	2125442	0.258309	0.00202731	0.0216364	7.05354e-05	0.0521046
116610-29 (BCN-203)
Point@01	3.6395	1000141000	0.0453101	2026066	0.0430521	0.00202578	0.0119058	1.35197e-05	0.21442
Point@02	3.67306	985147100	0.0958989	1995052	0.0995839	0.00202513	0.0104776	1.20866e-05	0.177676
Point@03	3.66218	976490900	0.0940235	1976643	0.0976406	0.00202423	0.0144795	1.24406e-05	0.16086
Point@04	3.66164	944037800	0.0997486	1910820	0.10099	0.00202409	0.0178318	1.15084e-05	0.267981
Point@05	3.64044	912324700	0.0970973	1846886	0.0937228	0.00202438	0.014957	1.35142e-05	0.174301
Point@06	3.61908	960431100	0.0423397	1944626	0.0432801	0.00202474	0.013274	1.19461e-05	0.194859
Point@07	3.61016	945494500	0.0376657	1913844	0.0435926	0.00202417	0.0121584	1.2329e-05	0.23797
Point@08	3.61986	906009800	0.0958735	1834023	0.0968697	0.00202429	0.0100143	1.14543e-05	0.301992
Point@09	3.58286	906601200	0.069505	1835092	0.0659825	0.00202415	0.0123537	1.39352e-05	0.180875
Point@10	3.58497	923109700	0.0340717	1869662	0.0414977	0.00202539	0.015695	1.56237e-05	0.151439
Point@11	3.56346	886710500	0.0392849	1795699	0.0435254	0.00202512	0.013535	1.47944e-05	0.136758
116610-21 (DGO-166)
Point@01	3.39878	848659600	0.185144	1714897	0.187173	0.00202071	0.0175797	4.64014e-05	0.112715
Point@02	3.39549	824890500	0.025676	1667379	0.0295832	0.00202133	0.0127761	5.3593e-05	0.371975
Point@03	3.4192	799158600	0.248052	1615478	0.249688	0.00202147	0.0138356	4.01208e-05	0.0888507
Point@04	3.3883	826354700	0.0241256	1669179	0.0301337	0.00201993	0.0156778	5.35051e-05	0.063852
Point@05	3.39847	736745500	0.10453	1488632	0.104497	0.00202055	0.016932	3.55753e-05	0.0782578
Point@06	3.38102	750034500	0.0394848	1517659	0.0420654	0.00202345	0.014282	6.40818e-05	0.27064
Point@07	3.39463	769403700	0.0259342	1556459	0.033433	0.00202294	0.015046	3.80759e-05	0.067183
Point@08	3.37202	774098300	0.0244023	1566013	0.0257231	0.00202302	0.0123605	3.7801e-05	0.0722823
Point@09	3.34621	785961200	0.0468278	1589833	0.05014	0.00202279	0.0207855	3.6782e-05	0.0832987
Point@10	3.36671	783219100	0.115085	1584897	0.1173	0.00202357	0.0113807	3.87159e-05	0.0660979
Point@11	3.35051	788389400	0.0414767	1594668	0.0453862	0.00202269	0.0147627	6.43851e-05	1.52468
Point@12	3.34269	1212193000	0.127882	2443393	0.138623	0.00201568	0.017334	6.19933e-05	0.15462
Point@13	3.3031	1009099000	0.0807834	2047847	0.0801058	0.00202938	0.0181644	4.88382e-05	0.0717532
Point@14	3.29645	1008638000	0.144587	2046076	0.145912	0.00202855	0.014592	6.5101e-05	1.26853
Point@15	3.29943	1007259000	0.0353796	2043240	0.0413259	0.00202851	0.0100155	3.97967e-05	0.0710821
Point@16	3.27611	1008903000	0.0389799	2048571	0.0437088	0.00203049	0.0108982	6.18316e-05	0.118844
Point@17	3.2837	951786500	0.248345	1933580	0.24742	0.00203153	0.0154874	3.78033e-05	0.0670786
Point@18	3.26477	979260200	0.0660152	1987285	0.0660081	0.00202937	0.0142455	3.95301e-05	0.0585784
118317-2 (KH03-27)
Point@01	3.52692	873637400	0.060757	1768132	0.0615684	0.00202387	0.00844188	4.00169e-05	0.0692992
Point@02	3.48476	864901500	0.0898181	1750611	0.0911162	0.00202406	0.0136103	4.05352e-05	0.0737014
Point@03	3.46934	833057500	0.103076	1685114	0.102789	0.00202281	0.0104525	3.97586e-05	0.0690023
Point@04	3.46027	863188900	0.0587833	1747901	0.0569792	0.00202494	0.0147774	4.45482e-05	0.0967795
Point@05	3.45065	863915900	0.0334326	1747242	0.0342392	0.00202247	0.0165592	4.09284e-05	0.0892991
Point@06	3.47858	817985500	0.0351304	1654201	0.040068	0.00202229	0.0150866	3.72809e-05	0.0736578
Point@07	3.44783	912581500	0.0617079	1848483	0.0571198	0.00202556	0.0144415	3.38665e-05	0.0889273
Point@08	3.46473	877690700	0.0487319	1776720	0.0458133	0.00202431	0.0134406	3.95907e-05	0.0673511
Point@09	3.43923	833670900	0.0337879	1686905	0.0347093	0.00202347	0.0134705	3.9735e-05	0.0946923
Point@10	3.44236	875043800	0.038893	1772079	0.0360473	0.00202513	0.0157295	3.87659e-05	0.0792632
Point@11	3.41912	865638800	0.0138496	1751551	0.018719	0.00202342	0.0103746	4.20079e-05	0.0857166
Point@12	3.40746	856323000	0.023902	1734435	0.0254626	0.00202544	0.0136636	4.01866e-05	0.0799172
Point@13	3.4167	886462200	0.0601147	1795648	0.0600462	0.00202564	0.0128974	4.21327e-05	0.076398
Point@14	3.41904	862961300	0.0276689	1747298	0.0321711	0.00202477	0.0113299	4.17809e-05	0.0723663
Point@15	3.43868	832287100	0.113565	1684730	0.111554	0.00202422	0.0111974	4.26855e-05	0.0679363
Point@16	3.40347	833240900	0.0413989	1687404	0.0446633	0.00202511	0.0105755	4.61305e-05	0.064633
116610-10 (SLP-114)
Point@01	3.59428	953802900	0.0884135	1931819	0.0875937	0.00202539	0.0716243	2.60591e-05	0.0720762
Point@02	3.58411	964324400	0.0529066	1952915	0.0567859	0.00202516	0.0711057	2.61703e-05	0.0715559
Point@03	3.57597	934956300	0.0955888	1893959	0.096115	0.00202572	0.0722095	2.6173e-05	0.0726667
Point@04	3.56479	950865700	0.0794551	1925636	0.0819719	0.00202514	0.0714046	2.63466e-05	0.0718593
Point@05	3.55141	914676600	0.0667454	1851351	0.0689353	0.00202405	0.0742846	2.61795e-05	0.0764809
Point@06	3.56502	905373700	0.0704454	1833328	0.0744528	0.00202494	0.0730851	2.6423e-05	0.0735518
Point@07	3.54296	883710800	0.0778354	1789939	0.077438	0.00202548	0.0781748	2.63588e-05	0.0772893
Point@08	3.53412	819066200	0.057448	1657552	0.0599761	0.00202371	0.0895618	2.80454e-05	0.0959442
Point@09	3.52583	858874200	0.0759671	1737568	0.078123	0.00202308	0.0744805	2.68919e-05	0.0749638
Point@10	3.5342	845272100	0.0198775	1709609	0.0229484	0.00202255	0.0861511	2.58523e-05	0.0882021
Point@11	3.55485	891988800	0.0672892	1805567	0.0697045	0.0020242	1.1055	3.34537e-05	1.1055
Point@12	3.53967	879977600	0.118685	1781421	0.119464	0.00202439	0.0748435	2.5829e-05	0.0753127
Point@13	3.52481	924157300	0.0756492	1870147	0.0772893	0.00202362	0.0727068	2.6107e-05	0.0731667
Point@14	3.49281	932668700	0.0796917	1889312	0.0803618	0.00202571	0.0723526	2.61258e-05	0.07281
Note: a The Faraday cup gain calibration was performed during machine tuning and the coeffition for specific Faraday cup was obtained and then applied to the singal collected. b 16O is detected using the 1010 Ohm Faraday cup, located in the L1 position. c 18O is detected using the 1011 Ohm Faraday cup, located in the H1 position. d 16O1H is detected using the electron multiplier of monocollector.…
